# Supplementary material for: Dipole moments of conjugated donor–acceptor substituted systems: calculations vs. experiments
Source: Royal Society of Chemistry journal article supplement (doi:10.1039/d0ra10182f), 2021-01-01
Supplement: d0ra10182f1.pdf [file d0ra10182f1.pdf]

## Dipole moments of conjugated donor – acceptor substituted systems: calculations vs. experiments

Vladimir Lokshin,<sup>a</sup> Mark Sigalov,<sup>b</sup> Nina Larina<sup>a</sup> and Vladimir Khodorkovsky<sup>a\*</sup>

<sup>a</sup> Aix Marseille Université, CNRS, CINaM UMR 7325, 13288, Marseille, France.

E-mail: khodor@cinam.univ-mrs.fr

<sup>b</sup> Dept. of Chemistry, Ben-Gurion Univ. of the Negev, Beer-Sheva, 84105, Israel.

### Table of Content

|                                           | Page |
|-------------------------------------------|------|
| <b>1. Pyrrole</b>                         |      |
| a. hf/aug-cc-pvdz                         | 2    |
| b. hf/aug-cc-pvtz                         | 3    |
| c. b3lyp/aug-cc-pvdz                      | 4    |
| d. b3lyp/aug-cc-pvtz                      | 5    |
| e. apfd/aug-cc-pvdz                       | 6    |
| f. apfd/aug-cc-pvtz                       | 7    |
| g. m062x/aug-cc-pvdz                      | 8    |
| h. m062x/aug-cc-pvtz                      | 9    |
| i. mp2fc/aug-cc-pvdz                      | 10   |
| j. mp2fc/aug-cc-pvtz                      | 11   |
| <b>2. Pyridine</b>                        |      |
| a. hf/aug-cc-pvdz                         | 12   |
| b. hf/aug-cc-pvtz                         | 13   |
| c. b3lyp/aug-cc-pvdz                      | 14   |
| d. b3lyp/aug-cc-pvtz                      | 15   |
| e. apfd/aug-cc-pvdz                       | 16   |
| f. apfd/aug-cc-pvtz                       | 17   |
| g. m062x/aug-cc-pvdz                      | 18   |
| h. m062x/aug-cc-pvtz                      | 19   |
| i. mp2fc/aug-cc-pvdz                      | 20   |
| j. mp2fc/aug-cc-pvtz                      | 21   |
| <b>3. Formamide</b>                       |      |
| a. hf/aug-cc-pvdz                         | 22   |
| b. hf/aug-cc-pvtz                         | 23   |
| c. b3lyp/aug-cc-pvdz                      | 24   |
| d. b3lyp/aug-cc-pvdz temp = 423           | 25   |
| e. b3lyp/aug-cc-pvtz                      | 26   |
| f. b3lyp/aug-cc-pvqz                      | 27   |
| g. apfd/aug-cc-pvdz                       | 28   |
| h. apfd/aug-cc-pvtz                       | 28   |
| i. m062x/aug-cc-pvdz                      | 29   |
| j. m062x/aug-cc-pvtz                      | 30   |
| k. m062x/aug-cc-pvqz                      | 31   |
| l. mp2fc/aug-cc-pvdz                      | 31   |
| m. mp2fc/aug-cc-pvtz                      | 32   |
| n. mp2fc/aug-cc-pvqz                      | 33   |
| <b>4. Anisole, b3lyp/aug-cc-pvtz</b>      | 34   |
| <b>5. Benzaldehyde, b3lyp/aug-cc-pvtz</b> | 36   |
| <b>6. Nitrobenzene, b3lyp/aug-cc-pvtz</b> | 38   |
| <b>7. Fig. 1S</b>                         | 40   |
| <b>8. Fig. 2S</b>                         | 41   |
| <b>9. Fig. 3S</b>                         | 41   |
| <b>10. Full reference to Gaussian 16</b>  | 42   |

## Pyrrole, hf/aug-cc-pvdz

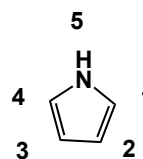

### Electric dipole

Property at reference geometry, Unit: Debye

X= 1.8615 Y= -0.0000 Z= 0.0000

Temperature: 0K, Unit: Debye

X= 1.7990 Y= -0.0000 Z= 0.0000

Temperature: 298K, Unit: Debye

X= 1.7848 Y= -0.0000 Z= -0.0002

### Internal coordinates for the Equilibrium structure (Se)

|      | 1        | 2        | 3        | 4        | 5        | 6        | 7        | 8        | 9        | 10       |
|------|----------|----------|----------|----------|----------|----------|----------|----------|----------|----------|
| 1 C  | 0.000000 |          |          |          |          |          |          |          |          |          |
| 2 C  | 1.363229 | 0.000000 |          |          |          |          |          |          |          |          |
| 3 C  | 2.246784 | 1.430228 | 0.000000 |          |          |          |          |          |          |          |
| 4 C  | 2.230166 | 2.246784 | 1.363229 | 0.000000 |          |          |          |          |          |          |
| 5 N  | 1.364705 | 2.208961 | 2.208961 | 1.364705 | 0.000000 |          |          |          |          |          |
| 6 H  | 2.100377 | 3.165016 | 3.165016 | 2.100377 | 0.993165 | 0.000000 |          |          |          |          |
| 7 H  | 1.075189 | 2.217941 | 3.306072 | 3.244812 | 2.131750 | 2.498627 | 0.000000 |          |          |          |
| 8 H  | 2.176395 | 1.076314 | 2.249310 | 3.289296 | 3.248984 | 4.171306 | 2.693236 | 0.000000 |          |          |
| 9 H  | 3.289296 | 2.249310 | 1.076314 | 2.176395 | 3.248984 | 4.171306 | 4.326250 | 2.727498 | 0.000000 |          |
| 10 H | 3.244812 | 3.306072 | 2.217941 | 1.075189 | 2.131750 | 2.498627 | 4.202725 | 4.326250 | 2.693236 | 0.000000 |

### Internal coordinates for the vibrationally average structure at 0K (Sz)

|      | 1        | 2        | 3        | 4        | 5        | 6        | 7        | 8        | 9        | 10       |
|------|----------|----------|----------|----------|----------|----------|----------|----------|----------|----------|
| 1 C  | 0.000000 |          |          |          |          |          |          |          |          |          |
| 2 C  | 1.367165 | 0.000000 |          |          |          |          |          |          |          |          |
| 3 C  | 2.255140 | 1.436658 | 0.000000 |          |          |          |          |          |          |          |
| 4 C  | 2.238887 | 2.255140 | 1.367165 | 0.000000 |          |          |          |          |          |          |
| 5 N  | 1.371867 | 2.219469 | 2.219469 | 1.371867 | 0.000000 |          |          |          |          |          |
| 6 H  | 2.103420 | 3.170245 | 3.170245 | 2.103420 | 0.987781 | 0.000000 |          |          |          |          |
| 7 H  | 1.077960 | 2.223067 | 3.316946 | 3.256694 | 2.140569 | 2.506039 | 0.000000 |          |          |          |
| 8 H  | 2.182138 | 1.078899 | 2.257576 | 3.300049 | 3.261903 | 4.179127 | 2.698718 | 0.000000 |          |          |
| 9 H  | 3.300049 | 2.257576 | 1.078899 | 2.182138 | 3.261903 | 4.179127 | 4.339322 | 2.737342 | 0.000000 |          |
| 10 H | 3.256694 | 3.316946 | 2.223067 | 1.077960 | 2.140569 | 2.506039 | 4.218194 | 4.339322 | 2.698718 | 0.000000 |

### Internal coordinates for the vibr. average structure at 298.15K (Sa)

|      | 1        | 2        | 3        | 4        | 5        | 6        | 7        | 8        | 9        | 10       |
|------|----------|----------|----------|----------|----------|----------|----------|----------|----------|----------|
| 1 C  | 0.000000 |          |          |          |          |          |          |          |          |          |
| 2 C  | 1.366953 | 0.000000 |          |          |          |          |          |          |          |          |
| 3 C  | 2.255160 | 1.436937 | 0.000000 |          |          |          |          |          |          |          |
| 4 C  | 2.238918 | 2.255160 | 1.366953 | 0.000000 |          |          |          |          |          |          |
| 5 N  | 1.372212 | 2.219883 | 2.219883 | 1.372212 | 0.000000 |          |          |          |          |          |
| 6 H  | 2.101590 | 3.167984 | 3.167984 | 2.101590 | 0.985037 | 0.000000 |          |          |          |          |
| 7 H  | 1.077647 | 2.222507 | 3.316653 | 3.256460 | 2.140493 | 2.504816 | 0.000000 |          |          |          |
| 8 H  | 2.181750 | 1.078608 | 2.257551 | 3.299748 | 3.262044 | 4.176690 | 2.698079 | 0.000000 |          |          |
| 9 H  | 3.299748 | 2.257551 | 1.078608 | 2.181750 | 3.262044 | 4.176690 | 4.338704 | 2.737172 | 0.000000 |          |
| 10 H | 3.256460 | 3.316653 | 2.222507 | 1.077647 | 2.140493 | 2.504816 | 4.217755 | 4.338704 | 2.698079 | 0.000000 |

## Pyrrole, hf/aug-cc-pvtz

### Electric dipole

-----  
Property at reference geometry, Unit: Debye  
-----

X= 1.8549 Y= -0.0000 Z= 0.0000  
-----

Temperature: 0K, Unit: Debye  
-----

X= 1.7948 Y= -0.0000 Z= 0.0000  
-----

Temperature: 298K, Unit: Debye  
-----

X= 1.7815 Y= -0.0000 Z= -0.0002  
-----

### Internal coordinates for the Equilibrium structure (Se)

|      | 1        | 2        | 3        | 4        | 5        | 6        | 7        | 8        | 9        | 10       |
|------|----------|----------|----------|----------|----------|----------|----------|----------|----------|----------|
| 1 C  | 0.000000 |          |          |          |          |          |          |          |          |          |
| 2 C  | 1.355594 | 0.000000 |          |          |          |          |          |          |          |          |
| 3 C  | 2.236637 | 1.425135 | 0.000000 |          |          |          |          |          |          |          |
| 4 C  | 2.220780 | 2.236637 | 1.355594 | 0.000000 |          |          |          |          |          |          |
| 5 N  | 1.359759 | 2.199379 | 2.199379 | 1.359759 | 0.000000 |          |          |          |          |          |
| 6 H  | 2.092245 | 3.150818 | 3.150818 | 2.092245 | 0.988437 | 0.000000 |          |          |          |          |
| 7 H  | 1.067834 | 2.204379 | 3.288787 | 3.228431 | 2.120639 | 2.486985 | 0.000000 |          |          |          |
| 8 H  | 2.163058 | 1.068510 | 2.237458 | 3.271216 | 3.232065 | 4.150092 | 2.676903 | 0.000000 |          |          |
| 9 H  | 3.271216 | 2.237458 | 1.068510 | 2.163059 | 3.232064 | 4.150092 | 4.301182 | 2.711674 | 0.000000 |          |
| 10 H | 3.228431 | 3.288787 | 2.204379 | 1.067834 | 2.120639 | 2.486985 | 4.179839 | 4.301182 | 2.676903 | 0.000000 |

### Internal coordinates for the vibrationally average structure at 0K (Sz)

|      | 1        | 2        | 3        | 4        | 5        | 6        | 7        | 8        | 9        | 10       |
|------|----------|----------|----------|----------|----------|----------|----------|----------|----------|----------|
| 1 C  | 0.000000 |          |          |          |          |          |          |          |          |          |
| 2 C  | 1.359498 | 0.000000 |          |          |          |          |          |          |          |          |
| 3 C  | 2.245040 | 1.431567 | 0.000000 |          |          |          |          |          |          |          |
| 4 C  | 2.229704 | 2.245040 | 1.359498 | 0.000000 |          |          |          |          |          |          |
| 5 N  | 1.366955 | 2.209742 | 2.209742 | 1.366955 | 0.000000 |          |          |          |          |          |
| 6 H  | 2.095446 | 3.156107 | 3.156107 | 2.095446 | 0.983267 | 0.000000 |          |          |          |          |
| 7 H  | 1.070851 | 2.209746 | 3.299962 | 3.240746 | 2.129743 | 2.494664 | 0.000000 |          |          |          |
| 8 H  | 2.169333 | 1.071551 | 2.245904 | 3.282364 | 3.245379 | 4.158533 | 2.683136 | 0.000000 |          |          |
| 9 H  | 3.282363 | 2.245903 | 1.071551 | 2.169332 | 3.245378 | 4.158532 | 4.314862 | 2.721395 | 0.000000 |          |
| 10 H | 3.240744 | 3.299961 | 2.209744 | 1.070849 | 2.129741 | 2.494663 | 4.195941 | 4.314861 | 2.683134 | 0.000000 |

### Internal coordinates for the vibr. average structure at 298.15K (Sa)

|      | 1        | 2        | 3        | 4        | 5        | 6        | 7        | 8        | 9        | 10       |
|------|----------|----------|----------|----------|----------|----------|----------|----------|----------|----------|
| 1 C  | 0.000000 |          |          |          |          |          |          |          |          |          |
| 2 C  | 1.359293 | 0.000000 |          |          |          |          |          |          |          |          |
| 3 C  | 2.245066 | 1.431836 | 0.000000 |          |          |          |          |          |          |          |
| 4 C  | 2.229756 | 2.245066 | 1.359293 | 0.000000 |          |          |          |          |          |          |
| 5 N  | 1.367287 | 2.210122 | 2.210122 | 1.367287 | 0.000000 |          |          |          |          |          |
| 6 H  | 2.093734 | 3.153975 | 3.153975 | 2.093734 | 0.980691 | 0.000000 |          |          |          |          |
| 7 H  | 1.070555 | 2.209215 | 3.299693 | 3.240548 | 2.129685 | 2.493526 | 0.000000 |          |          |          |
| 8 H  | 2.168988 | 1.071297 | 2.245892 | 3.282100 | 3.245527 | 4.156263 | 2.682556 | 0.000000 |          |          |
| 9 H  | 3.282099 | 2.245891 | 1.071296 | 2.168987 | 3.245526 | 4.156262 | 4.314297 | 2.721227 | 0.000000 |          |
| 10 H | 3.240546 | 3.299691 | 2.209213 | 1.070553 | 2.129684 | 2.493525 | 4.195554 | 4.314296 | 2.682554 | 0.000000 |

## Pyrrole, b3lyp/aug-cc-pvdz

### Electric dipole

-----  
Property at reference geometry, Unit: Debye  
-----

X= -1.8412 Y= -0.0000 Z= 0.0000  
-----

Temperature: 0K, Unit: Debye  
-----

X= -1.7815 Y= -0.0000 Z= 0.0000  
-----

Temperature: 298K, Unit: Debye  
-----

X= -1.7695 Y= -0.0000 Z= -0.0001

### Internal coordinates for the Equilibrium structure (Se)

|      | 1        | 2        | 3        | 4        | 5        | 6        | 7        | 8        | 9        | 10       |
|------|----------|----------|----------|----------|----------|----------|----------|----------|----------|----------|
| 1 C  | 0.000000 |          |          |          |          |          |          |          |          |          |
| 2 C  | 1.382597 | 0.000000 |          |          |          |          |          |          |          |          |
| 3 C  | 2.265382 | 1.428297 | 0.000000 |          |          |          |          |          |          |          |
| 4 C  | 2.254700 | 2.265382 | 1.382597 | 0.000000 |          |          |          |          |          |          |
| 5 N  | 1.376463 | 2.226799 | 2.226799 | 1.376463 | 0.000000 |          |          |          |          |          |
| 6 H  | 2.122126 | 3.198081 | 3.198081 | 2.122126 | 1.008148 | 0.000000 |          |          |          |          |
| 7 H  | 1.084325 | 2.249013 | 3.333861 | 3.276677 | 2.149535 | 2.519998 | 0.000000 |          |          |          |
| 8 H  | 2.200608 | 1.085636 | 2.253980 | 3.316935 | 3.275766 | 4.213115 | 2.729813 | 0.000000 |          |          |
| 9 H  | 3.316936 | 2.253980 | 1.085636 | 2.200608 | 3.275766 | 4.213115 | 4.363007 | 2.731799 | 0.000000 |          |
| 10 H | 3.276677 | 3.333861 | 2.249013 | 1.084325 | 2.149535 | 2.519998 | 4.240411 | 4.363006 | 2.729812 | 0.000000 |

### Internal coordinates for the vibrationally average structure at 0K (Sz)

|      | 1        | 2        | 3        | 4        | 5        | 6        | 7        | 8        | 9        | 10       |
|------|----------|----------|----------|----------|----------|----------|----------|----------|----------|----------|
| 1 C  | 0.000000 |          |          |          |          |          |          |          |          |          |
| 2 C  | 1.387460 | 0.000000 |          |          |          |          |          |          |          |          |
| 3 C  | 2.274676 | 1.434776 | 0.000000 |          |          |          |          |          |          |          |
| 4 C  | 2.264538 | 2.274675 | 1.387459 | 0.000000 |          |          |          |          |          |          |
| 5 N  | 1.384025 | 2.237995 | 2.237995 | 1.384024 | 0.000000 |          |          |          |          |          |
| 6 H  | 2.126718 | 3.205534 | 3.205534 | 2.126718 | 1.004328 | 0.000000 |          |          |          |          |
| 7 H  | 1.086404 | 2.254328 | 3.344914 | 3.289107 | 2.158498 | 2.528603 | 0.000000 |          |          |          |
| 8 H  | 2.206769 | 1.087970 | 2.262179 | 3.328451 | 3.289058 | 4.222791 | 2.735181 | 0.000000 |          |          |
| 9 H  | 3.328452 | 2.262180 | 1.087972 | 2.206770 | 3.289059 | 4.222792 | 4.376087 | 2.741734 | 0.000000 |          |
| 10 H | 3.289110 | 3.344917 | 2.254330 | 1.086407 | 2.158500 | 2.528604 | 4.256038 | 4.376089 | 2.735183 | 0.000000 |

### Internal coordinates for the vibr. average structure at 298.15K (Sa)

|      | 1        | 2        | 3        | 4        | 5        | 6        | 7        | 8        | 9        | 10       |
|------|----------|----------|----------|----------|----------|----------|----------|----------|----------|----------|
| 1 C  | 0.000000 |          |          |          |          |          |          |          |          |          |
| 2 C  | 1.387342 | 0.000000 |          |          |          |          |          |          |          |          |
| 3 C  | 2.274709 | 1.434966 | 0.000000 |          |          |          |          |          |          |          |
| 4 C  | 2.264572 | 2.274709 | 1.387341 | 0.000000 |          |          |          |          |          |          |
| 5 N  | 1.384317 | 2.238390 | 2.238390 | 1.384317 | 0.000000 |          |          |          |          |          |
| 6 H  | 2.124960 | 3.203422 | 3.203422 | 2.124960 | 1.001755 | 0.000000 |          |          |          |          |
| 7 H  | 1.085788 | 2.253578 | 3.344323 | 3.288594 | 2.158171 | 2.527285 | 0.000000 |          |          |          |
| 8 H  | 2.206274 | 1.087478 | 2.261911 | 3.327980 | 3.288975 | 4.220296 | 2.734276 | 0.000000 |          |          |
| 9 H  | 3.327982 | 2.261912 | 1.087479 | 2.206275 | 3.288976 | 4.220297 | 4.374996 | 2.741273 | 0.000000 |          |
| 10 H | 3.288597 | 3.344326 | 2.253581 | 1.085791 | 2.158173 | 2.527287 | 4.255075 | 4.374997 | 2.734279 | 0.000000 |

## Pyrrole, b3lyp/aug-cc-pvtz

### Electric dipole

Property at reference geometry, Unit: Debye

X= 1.8327 Y= -0.0000 Z= 0.0000

Temperature: 0K, Unit: Debye

X= 1.7723 Y= -0.0000 Z= 0.0000

Temperature: 298K, Unit: Debye

X= 1.7589 Y= -0.0000 Z= 0.0003

### Internal coordinates for the Equilibrium structure (Se)

|      | 1        | 2        | 3        | 4        | 5        | 6        | 7        | 8        | 9        | 10       |
|------|----------|----------|----------|----------|----------|----------|----------|----------|----------|----------|
| 1 C  | 0.000000 |          |          |          |          |          |          |          |          |          |
| 2 C  | 1.373536 | 0.000000 |          |          |          |          |          |          |          |          |
| 3 C  | 2.253051 | 1.421420 | 0.000000 |          |          |          |          |          |          |          |
| 4 C  | 2.243980 | 2.253051 | 1.373536 | 0.000000 |          |          |          |          |          |          |
| 5 N  | 1.371263 | 2.215933 | 2.215933 | 1.371263 | 0.000000 |          |          |          |          |          |
| 6 H  | 2.113865 | 3.182415 | 3.182415 | 2.113865 | 1.003171 | 0.000000 |          |          |          |          |
| 7 H  | 1.075495 | 2.232513 | 3.312795 | 3.257886 | 2.137261 | 2.508115 | 0.000000 |          |          |          |
| 8 H  | 2.184421 | 1.076437 | 2.239350 | 3.295311 | 3.256122 | 4.189008 | 2.709218 | 0.000000 |          |          |
| 9 H  | 3.295311 | 2.239350 | 1.076437 | 2.184421 | 3.256122 | 4.189008 | 4.332741 | 2.712761 | 0.000000 |          |
| 10 H | 3.257886 | 3.312795 | 2.232513 | 1.075495 | 2.13726  | 2.508115 | 4.214445 | 4.332741 | 2.709218 | 0.000000 |

### Internal coordinates for the vibrationally average structure at 0K (Sz)

|      | 1        | 2        | 3        | 4        | 5        | 6        | 7        | 8        | 9        | 10       |
|------|----------|----------|----------|----------|----------|----------|----------|----------|----------|----------|
| 1 C  | 0.000000 |          |          |          |          |          |          |          |          |          |
| 2 C  | 1.378332 | 0.000000 |          |          |          |          |          |          |          |          |
| 3 C  | 2.262376 | 1.427926 | 0.000000 |          |          |          |          |          |          |          |
| 4 C  | 2.254000 | 2.262376 | 1.378332 | 0.000000 |          |          |          |          |          |          |
| 5 N  | 1.378887 | 2.227020 | 2.227020 | 1.378887 | 0.000000 |          |          |          |          |          |
| 6 H  | 2.117936 | 3.189125 | 3.189125 | 2.117936 | 0.998706 | 0.000000 |          |          |          |          |
| 7 H  | 1.077771 | 2.238116 | 3.324125 | 3.270601 | 2.146319 | 2.516284 | 0.000000 |          |          |          |
| 8 H  | 2.191214 | 1.079310 | 2.247769 | 3.307261 | 3.269950 | 4.198639 | 2.715624 | 0.000000 |          |          |
| 9 H  | 3.307260 | 2.247769 | 1.079309 | 2.191213 | 3.269950 | 4.198638 | 4.346476 | 2.722519 | 0.000000 |          |
| 10 H | 3.270599 | 3.324124 | 2.238114 | 1.077769 | 2.14631  | 2.516284 | 4.230363 | 4.346475 | 2.715622 | 0.000000 |

### Internal coordinates for the vibr. average structure at 298.15K (Sa)

|      | 1        | 2        | 3        | 4        | 5        | 6        | 7        | 8        | 9        | 10       |
|------|----------|----------|----------|----------|----------|----------|----------|----------|----------|----------|
| 1 C  | 0.000000 |          |          |          |          |          |          |          |          |          |
| 2 C  | 1.378186 | 0.000000 |          |          |          |          |          |          |          |          |
| 3 C  | 2.262408 | 1.428134 | 0.000000 |          |          |          |          |          |          |          |
| 4 C  | 2.254055 | 2.262408 | 1.378186 | 0.000000 |          |          |          |          |          |          |
| 5 N  | 1.379217 | 2.227436 | 2.227436 | 1.379217 | 0.000000 |          |          |          |          |          |
| 6 H  | 2.115949 | 3.186718 | 3.186718 | 2.115949 | 0.995808 | 0.000000 |          |          |          |          |
| 7 H  | 1.077183 | 2.237368 | 3.323564 | 3.270136 | 2.146037 | 2.514841 | 0.000000 |          |          |          |
| 8 H  | 2.190768 | 1.078887 | 2.247560 | 3.306846 | 3.269964 | 4.195934 | 2.714779 | 0.000000 |          |          |
| 9 H  | 3.306845 | 2.247559 | 1.078887 | 2.190768 | 3.269963 | 4.195934 | 4.345466 | 2.722100 | 0.000000 |          |
| 10 H | 3.270134 | 3.323562 | 2.237367 | 1.077181 | 2.14603  | 2.514840 | 4.229473 | 4.345465 | 2.714777 | 0.000000 |

## Pyrrole, apfd/aug-cc-pvdz

### Electric dipole

-----  
Property at reference geometry, Unit: Debye  
-----

X= 1.8767 Y= -0.0000 Z= 0.0000  
-----

Temperature: 0K, Unit: Debye  
-----

X= 1.8204 Y= -0.0000 Z= 0.0000  
-----

Temperature: 298K, Unit: Debye  
-----

X= 1.8093 Y= -0.0000 Z= 0.0003  
-----

### Internal coordinates for the Equilibrium structure (Se)

|      | 1        | 2        | 3        | 4        | 5        | 6        | 7        | 8        | 9        | 10       |
|------|----------|----------|----------|----------|----------|----------|----------|----------|----------|----------|
| 1 C  | 0.000000 |          |          |          |          |          |          |          |          |          |
| 2 C  | 1.379804 | 0.000000 |          |          |          |          |          |          |          |          |
| 3 C  | 2.258481 | 1.423809 | 0.000000 |          |          |          |          |          |          |          |
| 4 C  | 2.245301 | 2.258481 | 1.379804 | 0.000000 |          |          |          |          |          |          |
| 5 N  | 1.370045 | 2.219793 | 2.219793 | 1.370045 | 0.000000 |          |          |          |          |          |
| 6 H  | 2.115290 | 3.190482 | 3.190482 | 2.115290 | 1.007503 | 0.000000 |          |          |          |          |
| 7 H  | 1.084734 | 2.246709 | 3.327394 | 3.267424 | 2.143856 | 2.512508 | 0.000000 |          |          |          |
| 8 H  | 2.198603 | 1.086204 | 2.250941 | 3.311097 | 3.269096 | 4.205666 | 2.727617 | 0.000000 |          |          |
| 9 H  | 3.311097 | 2.250941 | 1.086204 | 2.198603 | 3.269096 | 4.205666 | 4.357714 | 2.729928 | 0.000000 |          |
| 10 H | 3.267424 | 3.327394 | 2.246709 | 1.084734 | 2.143856 | 2.512508 | 4.230799 | 4.357714 | 2.727617 | 0.000000 |

### Internal coordinates for the vibrationally average structure at 0K (Sz)

|      | 1        | 2        | 3        | 4        | 5        | 6        | 7        | 8        | 9        | 10       |
|------|----------|----------|----------|----------|----------|----------|----------|----------|----------|----------|
| 1 C  | 0.000000 |          |          |          |          |          |          |          |          |          |
| 2 C  | 1.384536 | 0.000000 |          |          |          |          |          |          |          |          |
| 3 C  | 2.267394 | 1.430020 | 0.000000 |          |          |          |          |          |          |          |
| 4 C  | 2.254610 | 2.267395 | 1.384536 | 0.000000 |          |          |          |          |          |          |
| 5 N  | 1.377212 | 2.230563 | 2.230563 | 1.377212 | 0.000000 |          |          |          |          |          |
| 6 H  | 2.119415 | 3.197438 | 3.197438 | 2.119415 | 1.003608 | 0.000000 |          |          |          |          |
| 7 H  | 1.086675 | 2.251677 | 3.337901 | 3.279239 | 2.152460 | 2.520732 | 0.000000 |          |          |          |
| 8 H  | 2.204410 | 1.088326 | 2.258795 | 3.322075 | 3.281720 | 4.214590 | 2.732391 | 0.000000 |          |          |
| 9 H  | 3.322074 | 2.258795 | 1.088326 | 2.204410 | 3.281720 | 4.214590 | 4.370092 | 2.739611 | 0.000000 |          |
| 10 H | 3.279239 | 3.337901 | 2.251677 | 1.086675 | 2.152460 | 2.520731 | 4.245765 | 4.370092 | 2.732391 | 0.000000 |

### Internal coordinates for the vibr. average structure at 298.15K (Sa)

|      | 1        | 2        | 3        | 4        | 5        | 6        | 7        | 8        | 9        | 10       |
|------|----------|----------|----------|----------|----------|----------|----------|----------|----------|----------|
| 1 C  | 0.000000 |          |          |          |          |          |          |          |          |          |
| 2 C  | 1.384427 | 0.000000 |          |          |          |          |          |          |          |          |
| 3 C  | 2.267415 | 1.430187 | 0.000000 |          |          |          |          |          |          |          |
| 4 C  | 2.254622 | 2.267415 | 1.384427 | 0.000000 |          |          |          |          |          |          |
| 5 N  | 1.377470 | 2.230922 | 2.230922 | 1.377470 | 0.000000 |          |          |          |          |          |
| 6 H  | 2.117732 | 3.195427 | 3.195426 | 2.117732 | 1.001175 | 0.000000 |          |          |          |          |
| 7 H  | 1.086078 | 2.250957 | 3.337316 | 3.278720 | 2.152124 | 2.519460 | 0.000000 |          |          |          |
| 8 H  | 2.203933 | 1.087849 | 2.258524 | 3.321610 | 3.281614 | 4.212203 | 2.731517 | 0.000000 |          |          |
| 9 H  | 3.321610 | 2.258523 | 1.087849 | 2.203933 | 3.281614 | 4.212203 | 4.369027 | 2.739161 | 0.000000 |          |
| 10 H | 3.278719 | 3.337316 | 2.250958 | 1.086078 | 2.152124 | 2.519460 | 4.244808 | 4.369027 | 2.731517 | 0.000000 |

## Pyrrole, apfd/aug-cc-pvtz

### Electric dipole

Property at reference geometry, Unit: Debye

X= -1.8701 Y= -0.0000 Z= -0.0000

Temperature: OK, Unit: Debye

X= -1.8137 Y= -0.0000 Z= -0.0000

Temperature: 298K, Unit: Debye

X= -1.8021 Y= 0.0000 Z= -0.0001

### Internal coordinates for the Equilibrium structure (Se)

|      | 1        | 2        | 3        | 4        | 5        | 6        | 7        | 8        | 9        | 10       |
|------|----------|----------|----------|----------|----------|----------|----------|----------|----------|----------|
| 1 C  | 0.000000 |          |          |          |          |          |          |          |          |          |
| 2 C  | 1.371858 | 0.000000 |          |          |          |          |          |          |          |          |
| 3 C  | 2.247595 | 1.417815 | 0.000000 |          |          |          |          |          |          |          |
| 4 C  | 2.235617 | 2.247595 | 1.371858 | 0.000000 |          |          |          |          |          |          |
| 5 N  | 1.365233 | 2.210096 | 2.210096 | 1.365233 | 0.000000 |          |          |          |          |          |
| 6 H  | 2.107808 | 3.176610 | 3.176610 | 2.107808 | 1.003182 | 0.000000 |          |          |          |          |
| 7 H  | 1.077298 | 2.232608 | 3.309193 | 3.250867 | 2.132977 | 2.501747 | 0.000000 |          |          |          |
| 8 H  | 2.184689 | 1.078386 | 2.238356 | 3.292315 | 3.251954 | 4.184636 | 2.710171 | 0.000000 |          |          |
| 9 H  | 3.292315 | 2.238356 | 1.078386 | 2.184689 | 3.251954 | 4.184636 | 4.331719 | 2.713558 | 0.000000 |          |
| 10 H | 3.250867 | 3.309193 | 2.232608 | 1.077298 | 2.132977 | 2.501747 | 4.208040 | 4.331719 | 2.710171 | 0.000000 |

### Internal coordinates for the vibrationally average structure at OK (Sz)

|      | 1        | 2        | 3        | 4        | 5        | 6        | 7        | 8        | 9        | 10       |
|------|----------|----------|----------|----------|----------|----------|----------|----------|----------|----------|
| 1 C  | 0.000000 |          |          |          |          |          |          |          |          |          |
| 2 C  | 1.376537 | 0.000000 |          |          |          |          |          |          |          |          |
| 3 C  | 2.256536 | 1.424029 | 0.000000 |          |          |          |          |          |          |          |
| 4 C  | 2.245110 | 2.256536 | 1.376537 | 0.000000 |          |          |          |          |          |          |
| 5 N  | 1.372446 | 2.220736 | 2.220736 | 1.372446 | 0.000000 |          |          |          |          |          |
| 6 H  | 2.111590 | 3.183035 | 3.183035 | 2.111590 | 0.998879 | 0.000000 |          |          |          |          |
| 7 H  | 1.079401 | 2.237808 | 3.319925 | 3.262960 | 2.141691 | 2.509709 | 0.000000 |          |          |          |
| 8 H  | 2.191046 | 1.080953 | 2.246341 | 3.303642 | 3.264998 | 4.193625 | 2.715828 | 0.000000 |          |          |
| 9 H  | 3.303642 | 2.246341 | 1.080953 | 2.191046 | 3.264998 | 4.193625 | 4.344615 | 2.722970 | 0.000000 |          |
| 10 H | 3.262960 | 3.319925 | 2.237808 | 1.079401 | 2.141691 | 2.509709 | 4.223312 | 4.344615 | 2.715828 | 0.000000 |

### Internal coordinates for the vibr. average structure at 298.15K (Sa)

|      | 1        | 2        | 3        | 4        | 5        | 6        | 7        | 8        | 9        | 10       |
|------|----------|----------|----------|----------|----------|----------|----------|----------|----------|----------|
| 1 C  | 0.000000 |          |          |          |          |          |          |          |          |          |
| 2 C  | 1.376413 | 0.000000 |          |          |          |          |          |          |          |          |
| 3 C  | 2.256559 | 1.424206 | 0.000000 |          |          |          |          |          |          |          |
| 4 C  | 2.245142 | 2.256559 | 1.376413 | 0.000000 |          |          |          |          |          |          |
| 5 N  | 1.372723 | 2.221098 | 2.221098 | 1.372723 | 0.000000 |          |          |          |          |          |
| 6 H  | 2.109797 | 3.180877 | 3.180877 | 2.109797 | 0.996293 | 0.000000 |          |          |          |          |
| 7 H  | 1.078829 | 2.237100 | 3.319369 | 3.262485 | 2.141391 | 2.508387 | 0.000000 |          |          |          |
| 8 H  | 2.190617 | 1.080534 | 2.246112 | 3.303227 | 3.264957 | 4.191160 | 2.715015 | 0.000000 |          |          |
| 9 H  | 3.303227 | 2.246112 | 1.080534 | 2.190617 | 3.264957 | 4.191160 | 4.343621 | 2.722546 | 0.000000 |          |
| 10 H | 3.262485 | 3.319369 | 2.237100 | 1.078829 | 2.141391 | 2.508387 | 4.222421 | 4.343621 | 2.715015 | 0.000000 |

## Pyrrole, m062x/aug-cc-pvdz

### Electric dipole

-----  
Property at reference geometry, Unit: Debye  
-----

X= -1.8853 Y= -0.0000 Z= 0.0000  
-----

Temperature: 0K, Unit: Debye  
-----

X= -1.8332 Y= -0.0000 Z= 0.0000  
-----

Temperature: 298K, Unit: Debye  
-----

X= -1.8237 Y= 0.0000 Z= -0.0001  
-----

### Internal coordinates for the Equilibrium structure (Se)

|      | 1        | 2        | 3        | 4        | 5        | 6        | 7        | 8        | 9        | 10       |
|------|----------|----------|----------|----------|----------|----------|----------|----------|----------|----------|
| 1 C  | 0.000000 |          |          |          |          |          |          |          |          |          |
| 2 C  | 1.377785 | 0.000000 |          |          |          |          |          |          |          |          |
| 3 C  | 2.257727 | 1.425072 | 0.000000 |          |          |          |          |          |          |          |
| 4 C  | 2.244827 | 2.257727 | 1.377785 | 0.000000 |          |          |          |          |          |          |
| 5 N  | 1.370123 | 2.218699 | 2.218699 | 1.370123 | 0.000000 |          |          |          |          |          |
| 6 H  | 2.115430 | 3.189131 | 3.189131 | 2.115430 | 1.007342 | 0.000000 |          |          |          |          |
| 7 H  | 1.083106 | 2.243406 | 3.325183 | 3.265318 | 2.142193 | 2.511359 | 0.000000 |          |          |          |
| 8 H  | 2.194681 | 1.084084 | 2.250634 | 3.308244 | 3.265893 | 4.202188 | 2.722926 | 0.000000 |          |          |
| 9 H  | 3.308244 | 2.250634 | 1.084084 | 2.194681 | 3.265893 | 4.202188 | 4.353553 | 2.729768 | 0.000000 |          |
| 10 H | 3.265318 | 3.325183 | 2.243406 | 1.083106 | 2.142193 | 2.511359 | 4.227135 | 4.353553 | 2.722926 | 0.000000 |

### Internal coordinates for the vibrationally average structure at 0K (Sz)

|      | 1        | 2        | 3        | 4        | 5        | 6        | 7        | 8        | 9        | 10       |
|------|----------|----------|----------|----------|----------|----------|----------|----------|----------|----------|
| 1 C  | 0.000000 |          |          |          |          |          |          |          |          |          |
| 2 C  | 1.382628 | 0.000000 |          |          |          |          |          |          |          |          |
| 3 C  | 2.266568 | 1.431278 | 0.000000 |          |          |          |          |          |          |          |
| 4 C  | 2.253699 | 2.266568 | 1.382628 | 0.000000 |          |          |          |          |          |          |
| 5 N  | 1.377130 | 2.229671 | 2.229671 | 1.377130 | 0.000000 |          |          |          |          |          |
| 6 H  | 2.119387 | 3.196205 | 3.196205 | 2.119387 | 1.003354 | 0.000000 |          |          |          |          |
| 7 H  | 1.085761 | 2.248988 | 3.336298 | 3.277401 | 2.151218 | 2.519807 | 0.000000 |          |          |          |
| 8 H  | 2.200038 | 1.086376 | 2.259427 | 3.319666 | 3.278541 | 4.210902 | 2.727074 | 0.000000 |          |          |
| 9 H  | 3.319666 | 2.259427 | 1.086376 | 2.200038 | 3.278541 | 4.210902 | 4.367147 | 2.742163 | 0.000000 |          |
| 10 H | 3.277401 | 3.336298 | 2.248988 | 1.085761 | 2.151218 | 2.519807 | 4.243016 | 4.367147 | 2.727074 | 0.000000 |

### Internal coordinates for the vibr. average structure at 298.15K (Sa)

|      | 1        | 2        | 3        | 4        | 5        | 6        | 7        | 8        | 9        | 10       |
|------|----------|----------|----------|----------|----------|----------|----------|----------|----------|----------|
| 1 C  | 0.000000 |          |          |          |          |          |          |          |          |          |
| 2 C  | 1.382517 | 0.000000 |          |          |          |          |          |          |          |          |
| 3 C  | 2.266589 | 1.431451 | 0.000000 |          |          |          |          |          |          |          |
| 4 C  | 2.253707 | 2.266589 | 1.382517 | 0.000000 |          |          |          |          |          |          |
| 5 N  | 1.377359 | 2.229987 | 2.229987 | 1.377359 | 0.000000 |          |          |          |          |          |
| 6 H  | 2.117901 | 3.194425 | 3.194425 | 2.117901 | 1.001204 | 0.000000 |          |          |          |          |
| 7 H  | 1.085248 | 2.248349 | 3.335800 | 3.276953 | 2.150932 | 2.518691 | 0.000000 |          |          |          |
| 8 H  | 2.199577 | 1.085928 | 2.259196 | 3.319233 | 3.278417 | 4.208760 | 2.726271 | 0.000000 |          |          |
| 9 H  | 3.319233 | 2.259196 | 1.085928 | 2.199577 | 3.278417 | 4.208760 | 4.366201 | 2.741780 | 0.000000 |          |
| 10 H | 3.276953 | 3.335800 | 2.248349 | 1.085248 | 2.150932 | 2.518691 | 4.242193 | 4.366201 | 2.726271 | 0.000000 |



## Pyrrole,m062x/aug-cc-pvtz

### Electric dipole

-----  
Property at reference geometry, Unit: Debye  
-----

X= 1.8571 Y= -0.0000 Z= 0.0000  
-----

Temperature: 0K, Unit: Debye  
-----

X= 1.8039 Y= -0.0000 Z= 0.0000  
-----

Temperature: 298K, Unit: Debye  
-----

X= 1.7932 Y= 0.0000 Z= -0.0001  
-----

### Internal coordinates for the Equilibrium structure (Se)

|      | 1        | 2        | 3        | 4        | 5        | 6        | 7        | 8        | 9        | 10       |
|------|----------|----------|----------|----------|----------|----------|----------|----------|----------|----------|
| 1 C  | 0.000000 |          |          |          |          |          |          |          |          |          |
| 2 C  | 1.369716 | 0.000000 |          |          |          |          |          |          |          |          |
| 3 C  | 2.247853 | 1.420288 | 0.000000 |          |          |          |          |          |          |          |
| 4 C  | 2.236675 | 2.247853 | 1.369716 | 0.000000 |          |          |          |          |          |          |
| 5 N  | 1.366823 | 2.210484 | 2.210484 | 1.366823 | 0.000000 |          |          |          |          |          |
| 6 H  | 2.109905 | 3.177003 | 3.177003 | 2.109905 | 1.003312 | 0.000000 |          |          |          |          |
| 7 H  | 1.075460 | 2.229102 | 3.307853 | 3.250062 | 2.132121 | 2.502077 | 0.000000 |          |          |          |
| 8 H  | 2.180408 | 1.076110 | 2.239064 | 3.290238 | 3.250075 | 4.182750 | 2.705116 | 0.000000 |          |          |
| 9 H  | 3.290238 | 2.239064 | 1.076110 | 2.180408 | 3.250075 | 4.182750 | 4.328221 | 2.714516 | 0.000000 |          |
| 10 H | 3.250062 | 3.307853 | 2.229102 | 1.075460 | 2.132121 | 2.502077 | 4.205480 | 4.328221 | 2.705116 | 0.000000 |

### Internal coordinates for the vibrationally average structure at 0K (Sz)

|      | 1        | 2        | 3        | 4        | 5        | 6        | 7        | 8        | 9        | 10       |
|------|----------|----------|----------|----------|----------|----------|----------|----------|----------|----------|
| 1 C  | 0.000000 |          |          |          |          |          |          |          |          |          |
| 2 C  | 1.374369 | 0.000000 |          |          |          |          |          |          |          |          |
| 3 C  | 2.256705 | 1.426528 | 0.000000 |          |          |          |          |          |          |          |
| 4 C  | 2.245891 | 2.256705 | 1.374369 | 0.000000 |          |          |          |          |          |          |
| 5 N  | 1.373968 | 2.221219 | 2.221219 | 1.373968 | 0.000000 |          |          |          |          |          |
| 6 H  | 2.113700 | 3.183551 | 3.183551 | 2.113700 | 0.999036 | 0.000000 |          |          |          |          |
| 7 H  | 1.078423 | 2.235016 | 3.319352 | 3.262691 | 2.141403 | 2.510399 | 0.000000 |          |          |          |
| 8 H  | 2.186980 | 1.079193 | 2.247781 | 3.302096 | 3.263604 | 4.192190 | 2.711247 | 0.000000 |          |          |
| 9 H  | 3.302096 | 2.247781 | 1.079193 | 2.186980 | 3.263604 | 4.192190 | 4.342524 | 2.725402 | 0.000000 |          |
| 10 H | 3.262691 | 3.319352 | 2.235016 | 1.078423 | 2.141403 | 2.510399 | 4.222001 | 4.342524 | 2.711247 | 0.000000 |

### Internal coordinates for the vibr. average structure at 298.15K (Sa)

|      | 1        | 2        | 3        | 4        | 5        | 6        | 7        | 8        | 9        | 10       |
|------|----------|----------|----------|----------|----------|----------|----------|----------|----------|----------|
| 1 C  | 0.000000 |          |          |          |          |          |          |          |          |          |
| 2 C  | 1.374233 | 0.000000 |          |          |          |          |          |          |          |          |
| 3 C  | 2.256726 | 1.426718 | 0.000000 |          |          |          |          |          |          |          |
| 4 C  | 2.245921 | 2.256726 | 1.374233 | 0.000000 |          |          |          |          |          |          |
| 5 N  | 1.374231 | 2.221551 | 2.221551 | 1.374231 | 0.000000 |          |          |          |          |          |
| 6 H  | 2.112052 | 3.181553 | 3.181553 | 2.112052 | 0.996646 | 0.000000 |          |          |          |          |
| 7 H  | 1.077940 | 2.234385 | 3.318887 | 3.262292 | 2.141159 | 2.509196 | 0.000000 |          |          |          |
| 8 H  | 2.186577 | 1.078810 | 2.247593 | 3.301713 | 3.263573 | 4.189918 | 2.710524 | 0.000000 |          |          |
| 9 H  | 3.301713 | 2.247593 | 1.078810 | 2.186577 | 3.263573 | 4.189918 | 4.341654 | 2.725026 | 0.000000 |          |
| 10 H | 3.262292 | 3.318887 | 2.234385 | 1.077940 | 2.141159 | 2.509196 | 4.221251 | 4.341654 | 2.710524 | 0.000000 |

## Pyrrole, mp2fc/aug-cc-pvdz

### Electric dipole

Property at reference geometry, Unit: Debye

X= -1.9085 Y= -0.0000 Z= 0.0000

Temperature: 0K, Unit: Debye

X= -1.8503 Y= -0.0000 Z= 0.0000

Temperature: 298K, Unit: Debye

X= -1.8389 Y= -0.0000 Z= -0.0001

### Internal coordinates for the Equilibrium structure (Se)

|      | 1        | 2        | 3        | 4        | 5        | 6        | 7        | 8        | 9        | 10       |
|------|----------|----------|----------|----------|----------|----------|----------|----------|----------|----------|
| 1 C  | 0.000000 |          |          |          |          |          |          |          |          |          |
| 2 C  | 1.397500 | 0.000000 |          |          |          |          |          |          |          |          |
| 3 C  | 2.278646 | 1.429375 | 0.000000 |          |          |          |          |          |          |          |
| 4 C  | 2.266181 | 2.278646 | 1.397500 | 0.000000 |          |          |          |          |          |          |
| 5 N  | 1.379545 | 2.237529 | 2.237529 | 1.379545 | 0.000000 |          |          |          |          |          |
| 6 H  | 2.126159 | 3.212964 | 3.212964 | 2.126159 | 1.012148 | 0.000000 |          |          |          |          |
| 7 H  | 1.087802 | 2.268160 | 3.350595 | 3.290262 | 2.155417 | 2.523979 | 0.000000 |          |          |          |
| 8 H  | 2.215096 | 1.089018 | 2.259633 | 3.334895 | 3.288687 | 4.229763 | 2.749339 | 0.000000 |          |          |
| 9 H  | 3.334895 | 2.259633 | 1.089018 | 2.215096 | 3.288687 | 4.229763 | 4.384958 | 2.742445 | 0.000000 |          |
| 10 H | 3.290262 | 3.350595 | 2.268160 | 1.087802 | 2.155417 | 2.523979 | 4.254962 | 4.384959 | 2.749339 | 0.000000 |

### Internal coordinates for the vibrationally average structure at 0K (Sz)

|      | 1        | 2        | 3        | 4        | 5        | 6        | 7        | 8        | 9        | 10       |
|------|----------|----------|----------|----------|----------|----------|----------|----------|----------|----------|
| 1 C  | 0.000000 |          |          |          |          |          |          |          |          |          |
| 2 C  | 1.403123 | 0.000000 |          |          |          |          |          |          |          |          |
| 3 C  | 2.288445 | 1.435625 | 0.000000 |          |          |          |          |          |          |          |
| 4 C  | 2.276519 | 2.288445 | 1.403123 | 0.000000 |          |          |          |          |          |          |
| 5 N  | 1.387231 | 2.249218 | 2.249218 | 1.387231 | 0.000000 |          |          |          |          |          |
| 6 H  | 2.131190 | 3.221400 | 3.221400 | 2.131190 | 1.008806 | 0.000000 |          |          |          |          |
| 7 H  | 1.089114 | 2.273747 | 3.361419 | 3.302342 | 2.163721 | 2.532228 | 0.000000 |          |          |          |
| 8 H  | 2.220898 | 1.090796 | 2.267650 | 3.346617 | 3.301677 | 4.239537 | 2.754147 | 0.000000 |          |          |
| 9 H  | 3.346617 | 2.267650 | 1.090796 | 2.220898 | 3.301677 | 4.239537 | 4.397644 | 2.753087 | 0.000000 |          |
| 10 H | 3.302342 | 3.361419 | 2.273747 | 1.089114 | 2.163721 | 2.532228 | 4.269369 | 4.397644 | 2.754147 | 0.000000 |

### Internal coordinates for the vibr. average structure at 298.15K (Sa)

|      | 1        | 2        | 3        | 4        | 5        | 6        | 7        | 8        | 9        | 10       |
|------|----------|----------|----------|----------|----------|----------|----------|----------|----------|----------|
| 1 C  | 0.000000 |          |          |          |          |          |          |          |          |          |
| 2 C  | 1.403070 | 0.000000 |          |          |          |          |          |          |          |          |
| 3 C  | 2.288481 | 1.435746 | 0.000000 |          |          |          |          |          |          |          |
| 4 C  | 2.276545 | 2.288481 | 1.403070 | 0.000000 |          |          |          |          |          |          |
| 5 N  | 1.387481 | 2.249595 | 2.249594 | 1.387481 | 0.000000 |          |          |          |          |          |
| 6 H  | 2.129539 | 3.219461 | 3.219461 | 2.129539 | 1.006426 | 0.000000 |          |          |          |          |
| 7 H  | 1.088388 | 2.272970 | 3.360719 | 3.301715 | 2.163281 | 2.530912 | 0.000000 |          |          |          |
| 8 H  | 2.220397 | 1.090270 | 2.267323 | 3.346136 | 3.301524 | 4.237154 | 2.753171 | 0.000000 |          |          |
| 9 H  | 3.346136 | 2.267323 | 1.090270 | 2.220397 | 3.301524 | 4.237154 | 4.396438 | 2.752620 | 0.000000 |          |
| 10 H | 3.301715 | 3.360719 | 2.272970 | 1.088388 | 2.163281 | 2.530912 | 4.268194 | 4.396438 | 2.753171 | 0.000000 |

## Pyrrole, mp2fc/aug-cc-pvtz

### Electric dipole

-----  
Property at reference geometry, Unit: Debye  
-----

X= -1.8783 Y= -0.0000 Z= 0.0000  
-----

Temperature: 0K, Unit: Debye  
-----

X= -1.8222 Y= -0.0000 Z= 0.0000  
-----

Temperature: 298K, Unit: Debye  
-----

X= -1.8111 Y= -0.0000 Z= -0.0001  
-----

### Internal coordinates for the Equilibrium structure (Se)

|      | 1        | 2        | 3        | 4        | 5        | 6        | 7        | 8        | 9        | 10       |
|------|----------|----------|----------|----------|----------|----------|----------|----------|----------|----------|
| 1 C  | 0.000000 |          |          |          |          |          |          |          |          |          |
| 2 C  | 1.382929 | 0.000000 |          |          |          |          |          |          |          |          |
| 3 C  | 2.257392 | 1.416804 | 0.000000 |          |          |          |          |          |          |          |
| 4 C  | 2.246836 | 2.257392 | 1.382929 | 0.000000 |          |          |          |          |          |          |
| 5 N  | 1.369256 | 2.218160 | 2.218160 | 1.369256 | 0.000000 |          |          |          |          |          |
| 6 H  | 2.111530 | 3.186794 | 3.186795 | 2.111530 | 1.005062 | 0.000000 |          |          |          |          |
| 7 H  | 1.076097 | 2.244362 | 3.317886 | 3.259970 | 2.135644 | 2.503692 | 0.000000 |          |          |          |
| 8 H  | 2.191041 | 1.076818 | 2.237325 | 3.301510 | 3.257573 | 4.192204 | 2.719856 | 0.000000 |          |          |
| 9 H  | 3.301510 | 2.237325 | 1.076818 | 2.191041 | 3.257574 | 4.192205 | 4.340339 | 2.714621 | 0.000000 |          |
| 10 H | 3.259969 | 3.317886 | 2.244362 | 1.076097 | 2.135644 | 2.503692 | 4.214557 | 4.340339 | 2.719856 | 0.000000 |

### Internal coordinates for the vibrationally average structure at 0K (Sz)

|      | 1        | 2        | 3        | 4        | 5        | 6        | 7        | 8        | 9        | 10       |
|------|----------|----------|----------|----------|----------|----------|----------|----------|----------|----------|
| 1 C  | 0.000000 |          |          |          |          |          |          |          |          |          |
| 2 C  | 1.388450 | 0.000000 |          |          |          |          |          |          |          |          |
| 3 C  | 2.267106 | 1.423080 | 0.000000 |          |          |          |          |          |          |          |
| 4 C  | 2.257060 | 2.267107 | 1.388451 | 0.000000 |          |          |          |          |          |          |
| 5 N  | 1.376885 | 2.229749 | 2.229749 | 1.376885 | 0.000000 |          |          |          |          |          |
| 6 H  | 2.116152 | 3.194718 | 3.194718 | 2.116152 | 1.001300 | 0.000000 |          |          |          |          |
| 7 H  | 1.077726 | 2.249984 | 3.328901 | 3.272325 | 2.144327 | 2.512073 | 0.000000 |          |          |          |
| 8 H  | 2.197613 | 1.079187 | 2.245544 | 3.313591 | 3.271188 | 4.202249 | 2.725421 | 0.000000 |          |          |
| 9 H  | 3.313591 | 2.245545 | 1.079188 | 2.197614 | 3.271189 | 4.202250 | 4.353570 | 2.724952 | 0.000000 |          |
| 10 H | 3.272322 | 3.328898 | 2.249981 | 1.077723 | 2.144325 | 2.512072 | 4.229666 | 4.353566 | 2.725420 | 0.000000 |

### Internal coordinates for the vibr. average structure at 298.15K (Sa)

|      | 1        | 2        | 3        | 4        | 5        | 6        | 7        | 8        | 9        | 10       |
|------|----------|----------|----------|----------|----------|----------|----------|----------|----------|----------|
| 1 C  | 0.000000 |          |          |          |          |          |          |          |          |          |
| 2 C  | 1.388389 | 0.000000 |          |          |          |          |          |          |          |          |
| 3 C  | 2.267145 | 1.423206 | 0.000000 |          |          |          |          |          |          |          |
| 4 C  | 2.257102 | 2.267145 | 1.388390 | 0.000000 |          |          |          |          |          |          |
| 5 N  | 1.377133 | 2.230103 | 2.230103 | 1.377133 | 0.000000 |          |          |          |          |          |
| 6 H  | 2.114472 | 3.192733 | 3.192734 | 2.114472 | 0.998898 | 0.000000 |          |          |          |          |
| 7 H  | 1.077069 | 2.249262 | 3.328272 | 3.271779 | 2.143952 | 2.510780 | 0.000000 |          |          |          |
| 8 H  | 2.197201 | 1.078750 | 2.245274 | 3.313189 | 3.271112 | 4.199920 | 2.724570 | 0.000000 |          |          |
| 9 H  | 3.313189 | 2.245275 | 1.078750 | 2.197202 | 3.271112 | 4.199921 | 4.352505 | 2.724523 | 0.000000 |          |
| 10 H | 3.271776 | 3.328270 | 2.249260 | 1.077066 | 2.143950 | 2.510779 | 4.228632 | 4.352501 | 2.724569 | 0.000000 |

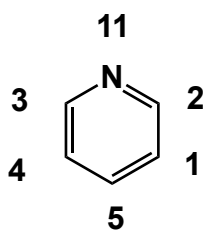

## Pyridine, hf/aug-cc-pvdz

### Electric dipole

-----  
 Property at reference geometry, Unit: Debye  
 -----

X= -2.2915 Y= 0.0000 Z= 0.0000  
 -----

Temperature: 0K, Unit: Debye  
 -----

X= -2.2445 Y= 0.0000 Z= 0.0000  
 -----

Temperature: 298K, Unit: Debye  
 -----

X= -2.2430 Y= 0.0000 Z= 0.0001  
 -----

### Internal coordinates for the Equilibrium structure (Se)

|      | 1        | 2        | 3        | 4        | 5        | 6        | 7        | 8        | 9        | 10       | 11       |
|------|----------|----------|----------|----------|----------|----------|----------|----------|----------|----------|----------|
| 1 C  | 0.000000 |          |          |          |          |          |          |          |          |          |          |
| 2 C  | 1.388705 | 0.000000 |          |          |          |          |          |          |          |          |          |
| 3 C  | 2.707545 | 2.265408 | 0.000000 |          |          |          |          |          |          |          |          |
| 4 C  | 2.384692 | 2.707545 | 1.388705 | 0.000000 |          |          |          |          |          |          |          |
| 5 C  | 1.386706 | 2.381979 | 2.381979 | 1.386706 | 0.000000 |          |          |          |          |          |          |
| 6 H  | 1.079636 | 2.146289 | 3.786126 | 3.377283 | 2.156786 | 0.000000 |          |          |          |          |          |
| 7 H  | 2.146397 | 1.081633 | 3.229607 | 3.788806 | 3.369051 | 2.476420 | 0.000000 |          |          |          |          |
| 8 H  | 3.788806 | 3.229607 | 1.081633 | 2.146397 | 3.369051 | 4.866871 | 4.087754 | 0.000000 |          |          |          |
| 9 H  | 3.377283 | 3.786126 | 2.146289 | 1.079636 | 2.156786 | 4.294235 | 4.866871 | 2.476420 | 0.000000 |          |          |
| 10 H | 2.149932 | 3.372341 | 3.372341 | 2.149932 | 1.080998 | 2.502261 | 4.278953 | 4.278953 | 2.502261 | 0.000000 |          |
| 11 N | 2.390443 | 1.323422 | 1.323422 | 2.390443 | 2.779843 | 3.353375 | 2.046400 | 2.046400 | 3.353375 | 3.860841 | 0.000000 |

### Internal coordinates for the vibrationally average structure at 0K (Sz)

|      | 1        | 2        | 3        | 4        | 5        | 6        | 7        | 8        | 9        | 10       | 11       |
|------|----------|----------|----------|----------|----------|----------|----------|----------|----------|----------|----------|
| 1 C  | 0.000000 |          |          |          |          |          |          |          |          |          |          |
| 2 C  | 1.393895 | 0.000000 |          |          |          |          |          |          |          |          |          |
| 3 C  | 2.717368 | 2.273098 | 0.000000 |          |          |          |          |          |          |          |          |
| 4 C  | 2.393714 | 2.717368 | 1.393895 | 0.000000 |          |          |          |          |          |          |          |
| 5 C  | 1.391661 | 2.390206 | 2.390206 | 1.391661 | 0.000000 |          |          |          |          |          |          |
| 6 H  | 1.083493 | 2.154402 | 3.799803 | 3.389818 | 2.164655 | 0.000000 |          |          |          |          |          |
| 7 H  | 2.155629 | 1.086873 | 3.241743 | 3.803852 | 3.382339 | 2.486896 | 0.000000 |          |          |          |          |
| 8 H  | 3.803852 | 3.241743 | 1.086873 | 2.155629 | 3.382339 | 4.885759 | 4.103478 | 0.000000 |          |          |          |
| 9 H  | 3.389818 | 3.799803 | 2.154402 | 1.083493 | 2.164655 | 4.310000 | 4.885759 | 2.486896 | 0.000000 |          |          |
| 10 H | 2.157703 | 3.384463 | 3.384463 | 2.157703 | 1.085223 | 2.511314 | 4.295836 | 4.295836 | 2.511314 | 0.000000 |          |
| 11 N | 2.398326 | 1.327403 | 1.327403 | 2.398326 | 2.788450 | 3.364855 | 2.054149 | 2.054149 | 3.364855 | 3.873673 | 0.000000 |

### Internal coordinates for the vibr. average structure at 298.15K (Sa)

|      | 1        | 2        | 3        | 4        | 5        | 6        | 7        | 8        | 9        | 10       | 11       |
|------|----------|----------|----------|----------|----------|----------|----------|----------|----------|----------|----------|
| 1 C  | 0.000000 |          |          |          |          |          |          |          |          |          |          |
| 2 C  | 1.393774 | 0.000000 |          |          |          |          |          |          |          |          |          |
| 3 C  | 2.717172 | 2.272906 | 0.000000 |          |          |          |          |          |          |          |          |
| 4 C  | 2.393594 | 2.717172 | 1.393774 | 0.000000 |          |          |          |          |          |          |          |
| 5 C  | 1.391544 | 2.389939 | 2.389939 | 1.391544 | 0.000000 |          |          |          |          |          |          |
| 6 H  | 1.083170 | 2.154055 | 3.799284 | 3.389387 | 2.164301 | 0.000000 |          |          |          |          |          |
| 7 H  | 2.155231 | 1.086521 | 3.241215 | 3.803302 | 3.381764 | 2.486487 | 0.000000 |          |          |          |          |
| 8 H  | 3.803302 | 3.241215 | 1.086521 | 2.155231 | 3.381764 | 4.884888 | 4.102653 | 0.000000 |          |          |          |
| 9 H  | 3.389387 | 3.799284 | 2.154055 | 1.083170 | 2.164301 | 4.309287 | 4.884888 | 2.486487 | 0.000000 |          |          |
| 10 H | 2.157270 | 3.383863 | 3.383863 | 2.157270 | 1.084871 | 2.510829 | 4.294970 | 4.294970 | 2.510829 | 0.000000 |          |
| 11 N | 2.398112 | 1.327274 | 1.327274 | 2.398112 | 2.788108 | 3.364363 | 2.053740 | 2.053740 | 3.364363 | 3.872980 | 0.000000 |

### Pyridine, hf/aug-cc-pvtz

#### Electric dipole

-----  
Property at reference geometry, Unit: Debye  
-----

X= 2.2720 Y= 0.0000 Z= 0.0000  
-----

Temperature: 0K, Unit: Debye  
-----

X= 2.2259 Y= 0.0000 Z= 0.0000  
-----

Temperature: 298K, Unit: Debye  
-----

X= 2.2246 Y= 0.0000 Z= -0.0000  
-----

### Internal coordinates for the Equilibrium structure (Se)

|      | 1        | 2        | 3        | 4        | 5        | 6        | 7        | 8        | 9        | 10       | 11       |
|------|----------|----------|----------|----------|----------|----------|----------|----------|----------|----------|----------|
| 1 C  | 0.000000 |          |          |          |          |          |          |          |          |          |          |
| 2 C  | 1.382092 | 0.000000 |          |          |          |          |          |          |          |          |          |
| 3 C  | 2.695833 | 2.256651 | 0.000000 |          |          |          |          |          |          |          |          |
| 4 C  | 2.374021 | 2.695833 | 1.382092 | 0.000000 |          |          |          |          |          |          |          |
| 5 C  | 1.380058 | 2.370559 | 2.370559 | 1.380058 | 0.000000 |          |          |          |          |          |          |
| 6 H  | 1.072076 | 2.134266 | 3.766902 | 3.359300 | 2.144283 | 0.000000 |          |          |          |          |          |
| 7 H  | 2.134996 | 1.074430 | 3.214170 | 3.769877 | 3.351328 | 2.463498 | 0.000000 |          |          |          |          |
| 8 H  | 3.769877 | 3.214170 | 1.074430 | 2.134996 | 3.351328 | 4.840437 | 4.066419 | 0.000000 |          |          |          |
| 9 H  | 3.359300 | 3.766902 | 2.134266 | 1.072076 | 2.144283 | 4.269361 | 4.840437 | 2.463498 | 0.000000 |          |          |
| 10 H | 2.137293 | 3.353717 | 3.353717 | 2.137293 | 1.073401 | 2.487025 | 4.254750 | 4.254750 | 2.487025 | 0.000000 |          |
| 11 N | 2.378072 | 1.317284 | 1.317284 | 2.378072 | 2.764603 | 3.334699 | 2.035692 | 2.035692 | 3.334699 | 3.838005 | 0.000000 |

### Internal coordinates for the vibrationally average structure at 0K (Sz)

|      | 1        | 2        | 3        | 4        | 5        | 6        | 7        | 8        | 9        | 10       | 11       |
|------|----------|----------|----------|----------|----------|----------|----------|----------|----------|----------|----------|
| 1 C  | 0.000000 |          |          |          |          |          |          |          |          |          |          |
| 2 C  | 1.387286 | 0.000000 |          |          |          |          |          |          |          |          |          |
| 3 C  | 2.705644 | 2.264384 | 0.000000 |          |          |          |          |          |          |          |          |
| 4 C  | 2.382964 | 2.705644 | 1.387286 | 0.000000 |          |          |          |          |          |          |          |
| 5 C  | 1.384969 | 2.378785 | 2.378785 | 1.384969 | 0.000000 |          |          |          |          |          |          |
| 6 H  | 1.076164 | 2.142498 | 3.780794 | 3.372005 | 2.152354 | 0.000000 |          |          |          |          |          |
| 7 H  | 2.144176 | 1.079813 | 3.226618 | 3.785062 | 3.364631 | 2.473778 | 0.000000 |          |          |          |          |
| 8 H  | 3.785062 | 3.226618 | 1.079813 | 2.144176 | 3.364631 | 4.859697 | 4.082816 | 0.000000 |          |          |          |
| 9 H  | 3.372005 | 3.780794 | 2.142498 | 1.076164 | 2.152354 | 4.285541 | 4.859697 | 2.473778 | 0.000000 |          |          |
| 10 H | 2.145245 | 3.366081 | 3.366081 | 2.145245 | 1.077889 | 2.496366 | 4.271814 | 4.271815 | 2.496366 | 0.000000 |          |
| 11 N | 2.385885 | 1.321251 | 1.321251 | 2.385885 | 2.773132 | 3.346288 | 2.043786 | 2.043786 | 3.346288 | 3.851021 | 0.000000 |

### Internal coordinates for the vibr. average structure at 298.15K (Sa)

|      | 1        | 2        | 3        | 4        | 5        | 6        | 7        | 8        | 9        | 10       | 11       |
|------|----------|----------|----------|----------|----------|----------|----------|----------|----------|----------|----------|
| 1 C  | 0.000000 |          |          |          |          |          |          |          |          |          |          |
| 2 C  | 1.387171 | 0.000000 |          |          |          |          |          |          |          |          |          |
| 3 C  | 2.705459 | 2.264205 | 0.000000 |          |          |          |          |          |          |          |          |
| 4 C  | 2.382852 | 2.705459 | 1.387171 | 0.000000 |          |          |          |          |          |          |          |
| 5 C  | 1.384858 | 2.378531 | 2.378531 | 1.384858 | 0.000000 |          |          |          |          |          |          |
| 6 H  | 1.075859 | 2.142172 | 3.780306 | 3.371598 | 2.152018 | 0.000000 |          |          |          |          |          |
| 7 H  | 2.143793 | 1.079470 | 3.226109 | 3.784533 | 3.364077 | 2.473391 | 0.000000 |          |          |          |          |
| 8 H  | 3.784533 | 3.226109 | 1.079470 | 2.143793 | 3.364077 | 4.858865 | 4.082018 | 0.000000 |          |          |          |
| 9 H  | 3.371598 | 3.780306 | 2.142172 | 1.075859 | 2.152018 | 4.284866 | 4.858865 | 2.473391 | 0.000000 |          |          |
| 10 H | 2.144830 | 3.365506 | 3.365506 | 2.144830 | 1.077551 | 2.495901 | 4.270981 | 4.270982 | 2.495901 | 0.000000 |          |
| 11 N | 2.385678 | 1.321127 | 1.321127 | 2.385678 | 2.772801 | 3.345820 | 2.043390 | 2.043390 | 3.345820 | 3.850352 | 0.000000 |

### Pyridine, b3lyp/aug-cc-pvdz

#### Electric dipole

-----  
Property at reference geometry, Unit: Debye  
-----

X= 2.2767 Y= 0.0000 Z= 0.0000  
-----

Temperature: 0K, Unit: Debye  
-----

X= 2.2222 Y= 0.0000 Z= 0.0000  
-----

Temperature: 298K, Unit: Debye  
-----

X= 2.2196 Y= 0.0000 Z= 0.0001  
-----

### Internal coordinates for the Equilibrium structure (Se)

|      | 1        | 2        | 3        | 4        | 5        | 6        | 7        | 8        | 9        | 10       | 11       |
|------|----------|----------|----------|----------|----------|----------|----------|----------|----------|----------|----------|
| 1 C  | 0.000000 |          |          |          |          |          |          |          |          |          |          |
| 2 C  | 1.398727 | 0.000000 |          |          |          |          |          |          |          |          |          |
| 3 C  | 2.729539 | 2.289267 | 0.000000 |          |          |          |          |          |          |          |          |
| 4 C  | 2.399871 | 2.729539 | 1.398727 | 0.000000 |          |          |          |          |          |          |          |
| 5 C  | 1.396341 | 2.401991 | 2.401991 | 1.396342 | 0.000000 |          |          |          |          |          |          |
| 6 H  | 1.090245 | 2.163399 | 3.818825 | 3.401503 | 2.172450 | 0.000000 |          |          |          |          |          |
| 7 H  | 2.165852 | 1.092806 | 3.264033 | 3.821994 | 3.399184 | 2.498111 | 0.000000 |          |          |          |          |
| 8 H  | 3.821994 | 3.264033 | 1.092806 | 2.165852 | 3.399185 | 4.910802 | 4.132189 | 0.000000 |          |          |          |
| 9 H  | 3.401503 | 3.818825 | 2.163399 | 1.090245 | 2.172450 | 4.325895 | 4.910802 | 2.498112 | 0.000000 |          |          |
| 10 H | 2.167425 | 3.401000 | 3.401000 | 2.167425 | 1.090872 | 2.520392 | 4.316646 | 4.316646 | 2.520391 | 0.000000 |          |
| 11 N | 2.414265 | 1.340313 | 1.340314 | 2.414265 | 2.809043 | 3.386731 | 2.069012 | 2.069012 | 3.386732 | 3.899915 | 0.000000 |

### Internal coordinates for the vibrationally average structure at 0K (Sz)

|      | 1        | 2        | 3        | 4        | 5        | 6        | 7        | 8        | 9        | 10       | 11       |
|------|----------|----------|----------|----------|----------|----------|----------|----------|----------|----------|----------|
| 1 C  | 0.000000 |          |          |          |          |          |          |          |          |          |          |
| 2 C  | 1.404268 | 0.000000 |          |          |          |          |          |          |          |          |          |
| 3 C  | 2.740308 | 2.297987 | 0.000000 |          |          |          |          |          |          |          |          |
| 4 C  | 2.409639 | 2.740307 | 1.404267 | 0.000000 |          |          |          |          |          |          |          |
| 5 C  | 1.401655 | 2.410845 | 2.410845 | 1.401656 | 0.000000 |          |          |          |          |          |          |
| 6 H  | 1.094322 | 2.172063 | 3.833678 | 3.414913 | 2.180766 | 0.000000 |          |          |          |          |          |
| 7 H  | 2.175874 | 1.098227 | 3.277177 | 3.838155 | 3.413458 | 2.509722 | 0.000000 |          |          |          |          |
| 8 H  | 3.838150 | 3.277172 | 1.098221 | 2.175869 | 3.413453 | 4.931027 | 4.148752 | 0.000000 |          |          |          |
| 9 H  | 3.414914 | 3.833678 | 2.172064 | 1.094324 | 2.180767 | 4.342597 | 4.931034 | 2.509721 | 0.000000 |          |          |
| 10 H | 2.175469 | 3.413707 | 3.413707 | 2.175469 | 1.095100 | 2.529737 | 4.334538 | 4.334533 | 2.529737 | 0.000000 |          |
| 11 N | 2.422521 | 1.344658 | 1.344659 | 2.422521 | 2.817944 | 3.398900 | 2.077142 | 2.077137 | 3.398901 | 3.913043 | 0.000000 |

### Internal coordinates for the vibr. average structure at 298.15K (Sa)

|      | 1        | 2        | 3        | 4        | 5        | 6        | 7        | 8        | 9        | 10       | 11       |
|------|----------|----------|----------|----------|----------|----------|----------|----------|----------|----------|----------|
| 1 C  | 0.000000 |          |          |          |          |          |          |          |          |          |          |
| 2 C  | 1.404090 | 0.000000 |          |          |          |          |          |          |          |          |          |
| 3 C  | 2.740059 | 2.297769 | 0.000000 |          |          |          |          |          |          |          |          |
| 4 C  | 2.409489 | 2.740057 | 1.404090 | 0.000000 |          |          |          |          |          |          |          |
| 5 C  | 1.401498 | 2.410476 | 2.410477 | 1.401498 | 0.000000 |          |          |          |          |          |          |
| 6 H  | 1.093815 | 2.171525 | 3.832924 | 3.414271 | 2.180226 | 0.000000 |          |          |          |          |          |
| 7 H  | 2.175273 | 1.097665 | 3.276414 | 3.837341 | 3.412604 | 2.509111 | 0.000000 |          |          |          |          |
| 8 H  | 3.837335 | 3.276408 | 1.097658 | 2.175268 | 3.412599 | 4.929708 | 4.147504 | 0.000000 |          |          |          |
| 9 H  | 3.414272 | 3.832924 | 2.171526 | 1.093817 | 2.180227 | 4.341509 | 4.929715 | 2.509109 | 0.000000 |          |          |
| 10 H | 2.174827 | 3.412823 | 3.412823 | 2.174827 | 1.094560 | 2.529002 | 4.333241 | 4.333236 | 2.529002 | 0.000000 |          |
| 11 N | 2.422180 | 1.344476 | 1.344477 | 2.422179 | 2.817412 | 3.398130 | 2.076522 | 2.076517 | 3.398132 | 3.911972 | 0.000000 |

### Pyridine b3lyp/aug-cc-pvtz

#### Electric dipole

Property at reference geometry, Unit: Debye

X= 2.2639 Y= 0.0000 Z= 0.0000

Temperature: 0K, Unit: Debye

X= 2.2098 Y= 0.0000 Z= 0.0000

Temperature: 298K, Unit: Debye

X= 2.2072 Y= -0.0000 Z= 0.0001

### Internal coordinates for the Equilibrium structure (Se)

|      | 1        | 2        | 3        | 4        | 5        | 6        | 7        | 8        | 9        | 10       | 11       |
|------|----------|----------|----------|----------|----------|----------|----------|----------|----------|----------|----------|
| 1 C  | 0.000000 |          |          |          |          |          |          |          |          |          |          |
| 2 C  | 1.390469 | 0.000000 |          |          |          |          |          |          |          |          |          |
| 3 C  | 2.715673 | 2.279583 | 0.000000 |          |          |          |          |          |          |          |          |
| 4 C  | 2.387048 | 2.715673 | 1.390469 | 0.000000 |          |          |          |          |          |          |          |
| 5 C  | 1.388331 | 2.388172 | 2.388172 | 1.388331 | 0.000000 |          |          |          |          |          |          |
| 6 H  | 1.081220 | 2.148567 | 3.795998 | 3.379937 | 2.157452 | 0.000000 |          |          |          |          |          |
| 7 H  | 2.152052 | 1.084112 | 3.246246 | 3.799412 | 3.377864 | 2.482376 | 0.000000 |          |          |          |          |
| 8 H  | 3.799412 | 3.246246 | 1.084112 | 2.152052 | 3.377864 | 4.879267 | 4.107250 | 0.000000 |          |          |          |
| 9 H  | 3.379937 | 3.795998 | 2.148567 | 1.081220 | 2.157452 | 4.296076 | 4.879267 | 2.482376 | 0.000000 |          |          |
| 10 H | 2.152276 | 3.378528 | 3.378528 | 2.152276 | 1.081832 | 2.502109 | 4.287547 | 4.287547 | 2.502109 | 0.000000 |          |
| 11 N | 2.399779 | 1.333673 | 1.333673 | 2.399779 | 2.791130 | 3.364696 | 2.056528 | 2.056528 | 3.364696 | 3.872962 | 0.000000 |

### Internal coordinates for the vibrationally average structure at 0K (Sz)

|      | 1        | 2        | 3        | 4        | 5        | 6        | 7        | 8        | 9        | 10       | 11       |
|------|----------|----------|----------|----------|----------|----------|----------|----------|----------|----------|----------|
| 1 C  | 0.000000 |          |          |          |          |          |          |          |          |          |          |
| 2 C  | 1.396042 | 0.000000 |          |          |          |          |          |          |          |          |          |
| 3 C  | 2.726436 | 2.288284 | 0.000000 |          |          |          |          |          |          |          |          |
| 4 C  | 2.396784 | 2.726436 | 1.396042 | 0.000000 |          |          |          |          |          |          |          |
| 5 C  | 1.393598 | 2.396994 | 2.396994 | 1.393598 | 0.000000 |          |          |          |          |          |          |
| 6 H  | 1.085530 | 2.157332 | 3.811069 | 3.393603 | 2.166054 | 0.000000 |          |          |          |          |          |
| 7 H  | 2.161891 | 1.089642 | 3.259682 | 3.815690 | 3.392021 | 2.493536 | 0.000000 |          |          |          |          |
| 8 H  | 3.815690 | 3.259682 | 1.089642 | 2.161891 | 3.392021 | 4.899844 | 4.124578 | 0.000000 |          |          |          |
| 9 H  | 3.393603 | 3.811069 | 2.157332 | 1.085530 | 2.166054 | 4.313351 | 4.899844 | 2.493536 | 0.000000 |          |          |
| 10 H | 2.160559 | 3.391544 | 3.391544 | 2.160559 | 1.086424 | 2.511893 | 4.305556 | 4.305556 | 2.511893 | 0.000000 |          |
| 11 N | 2.408046 | 1.338004 | 1.338005 | 2.408046 | 2.799987 | 3.377006 | 2.065057 | 2.065057 | 3.377006 | 3.886411 | 0.000000 |

### Internal coordinates for the vibr. average structure at 298.15K (Sa)

|      | 1        | 2        | 3        | 4        | 5        | 6        | 7        | 8        | 9        | 10       | 11       |
|------|----------|----------|----------|----------|----------|----------|----------|----------|----------|----------|----------|
| 1 C  | 0.000000 |          |          |          |          |          |          |          |          |          |          |
| 2 C  | 1.395869 | 0.000000 |          |          |          |          |          |          |          |          |          |
| 3 C  | 2.726191 | 2.288071 | 0.000000 |          |          |          |          |          |          |          |          |
| 4 C  | 2.396634 | 2.726191 | 1.395869 | 0.000000 |          |          |          |          |          |          |          |
| 5 C  | 1.393443 | 2.396634 | 2.396634 | 1.393443 | 0.000000 |          |          |          |          |          |          |
| 6 H  | 1.085055 | 2.156824 | 3.810352 | 3.392993 | 2.165542 | 0.000000 |          |          |          |          |          |
| 7 H  | 2.161304 | 1.089094 | 3.258937 | 3.814895 | 3.391187 | 2.492948 | 0.000000 |          |          |          |          |
| 8 H  | 3.814895 | 3.258937 | 1.089094 | 2.161304 | 3.391187 | 4.898577 | 4.123363 | 0.000000 |          |          |          |
| 9 H  | 3.392993 | 3.810352 | 2.156824 | 1.085055 | 2.165542 | 4.312321 | 4.898576 | 2.492948 | 0.000000 |          |          |
| 10 H | 2.159949 | 3.390700 | 3.390700 | 2.159949 | 1.085917 | 2.511194 | 4.304307 | 4.304307 | 2.511194 | 0.000000 |          |
| 11 N | 2.407709 | 1.337825 | 1.337825 | 2.407709 | 2.799465 | 3.376270 | 2.064454 | 2.064454 | 3.376270 | 3.885382 | 0.000000 |

### Pyridine, apfd/aug-cc-pvdz

#### Electric dipole

-----  
Property at reference geometry, Unit: Debye  
-----

X= 2.2593 Y= 0.0000 Z= 0.0000  
-----

Temperature: 0K, Unit: Debye  
-----

X= 2.2019 Y= 0.0000 Z= 0.0000  
-----

Temperature: 298K, Unit: Debye  
-----

X= 2.1989 Y= -0.0000 Z= 0.0001  
-----

### Internal coordinates for the Equilibrium structure (Se)

|      | 1        | 2        | 3        | 4        | 5        | 6        | 7        | 8        | 9        | 10       | 11       |
|------|----------|----------|----------|----------|----------|----------|----------|----------|----------|----------|----------|
| 1 C  | 0.000000 |          |          |          |          |          |          |          |          |          |          |
| 2 C  | 1.396122 | 0.000000 |          |          |          |          |          |          |          |          |          |
| 3 C  | 2.722750 | 2.281182 | 0.000000 |          |          |          |          |          |          |          |          |
| 4 C  | 2.395343 | 2.722750 | 1.396122 | 0.000000 |          |          |          |          |          |          |          |
| 5 C  | 1.393690 | 2.396498 | 2.396498 | 1.393690 | 0.000000 |          |          |          |          |          |          |
| 6 H  | 1.090906 | 2.162147 | 3.812667 | 3.397815 | 2.170894 | 0.000000 |          |          |          |          |          |
| 7 H  | 2.164295 | 1.093301 | 3.255727 | 3.815661 | 3.394706 | 2.497513 | 0.000000 |          |          |          |          |
| 8 H  | 3.815661 | 3.255727 | 1.093301 | 2.164295 | 3.394706 | 4.905067 | 4.122624 | 0.000000 |          |          |          |
| 9 H  | 3.397815 | 3.812667 | 2.162147 | 1.090906 | 2.170894 | 4.323002 | 4.905067 | 2.497513 | 0.000000 |          |          |
| 10 H | 2.165692 | 3.396575 | 3.396575 | 2.165692 | 1.091674 | 2.518921 | 4.313324 | 4.313324 | 2.518921 | 0.000000 |          |
| 11 N | 2.409677 | 1.336179 | 1.336179 | 2.409677 | 2.803673 | 3.382638 | 2.064059 | 2.064059 | 3.382638 | 3.895348 | 0.000000 |

### Internal coordinates for the vibrationally average structure at 0K (Sz)

|      | 1        | 2        | 3        | 4        | 5        | 6        | 7        | 8        | 9        | 10       | 11       |
|------|----------|----------|----------|----------|----------|----------|----------|----------|----------|----------|----------|
| 1 C  | 0.000000 |          |          |          |          |          |          |          |          |          |          |
| 2 C  | 1.402171 | 0.000000 |          |          |          |          |          |          |          |          |          |
| 3 C  | 2.736431 | 2.292810 | 0.000000 |          |          |          |          |          |          |          |          |
| 4 C  | 2.408386 | 2.736431 | 1.402171 | 0.000000 |          |          |          |          |          |          |          |
| 5 C  | 1.399565 | 2.405024 | 2.405024 | 1.399565 | 0.000000 |          |          |          |          |          |          |
| 6 H  | 1.094663 | 2.171868 | 3.830177 | 3.413687 | 2.179635 | 0.000000 |          |          |          |          |          |
| 7 H  | 2.175214 | 1.098426 | 3.270941 | 3.834393 | 3.409125 | 2.511729 | 0.000000 |          |          |          |          |
| 8 H  | 3.834393 | 3.270941 | 1.098426 | 2.175214 | 3.409125 | 4.927611 | 4.140123 | 0.000000 |          |          |          |
| 9 H  | 3.413687 | 3.830177 | 2.171868 | 1.094663 | 2.179635 | 4.341069 | 4.927611 | 2.511729 | 0.000000 |          |          |
| 10 H | 2.173112 | 3.408512 | 3.408512 | 2.173112 | 1.095726 | 2.527341 | 4.331132 | 4.331132 | 2.527341 | 0.000000 |          |
| 11 N | 2.417897 | 1.340996 | 1.340996 | 2.417897 | 2.809933 | 3.395344 | 2.072536 | 2.072536 | 3.395344 | 3.905659 | 0.000000 |



### Internal coordinates for the vibr. average structure at 298.15K (Sa)

|      | 1        | 2        | 3        | 4        | 5        | 6        | 7        | 8        | 9        | 10       | 11       |
|------|----------|----------|----------|----------|----------|----------|----------|----------|----------|----------|----------|
| 1 C  | 0.000000 |          |          |          |          |          |          |          |          |          |          |
| 2 C  | 1.402009 | 0.000000 |          |          |          |          |          |          |          |          |          |
| 3 C  | 2.736313 | 2.292725 | 0.000000 |          |          |          |          |          |          |          |          |
| 4 C  | 2.408391 | 2.736313 | 1.402009 | 0.000000 |          |          |          |          |          |          |          |
| 5 C  | 1.399432 | 2.404627 | 2.404627 | 1.399432 | 0.000000 |          |          |          |          |          |          |
| 6 H  | 1.094151 | 2.171383 | 3.829553 | 3.413171 | 2.179123 | 0.000000 |          |          |          |          |          |
| 7 H  | 2.174652 | 1.097850 | 3.270267 | 3.833695 | 3.408268 | 2.511246 | 0.000000 |          |          |          |          |
| 8 H  | 3.833695 | 3.270267 | 1.097850 | 2.174652 | 3.408268 | 4.926405 | 4.138906 | 0.000000 |          |          |          |
| 9 H  | 3.413171 | 3.829553 | 2.171383 | 1.094151 | 2.179123 | 4.340064 | 4.926405 | 2.511246 | 0.000000 |          |          |
| 10 H | 2.172439 | 3.407580 | 3.407580 | 2.172439 | 1.095181 | 2.526566 | 4.329824 | 4.329824 | 2.526565 | 0.000000 |          |
| 11 N | 2.417543 | 1.340832 | 1.340832 | 2.417543 | 2.809257 | 3.394600 | 2.071925 | 2.071925 | 3.394600 | 3.904438 | 0.000000 |

### Pyridine, apfd/aug-cc-pvtz

#### Electric dipole

-----  
Property at reference geometry, Unit: Debye  
-----

X= 2.2447 Y= 0.0000 Z= -0.0000  
-----

Temperature: 0K, Unit: Debye  
-----

X= 2.1845 Y= 0.0000 Z= -0.0000  
-----

Temperature: 298K, Unit: Debye  
-----

X= 2.1814 Y= 0.0000 Z= 0.0001  
-----

### Internal coordinates for the Equilibrium structure (Se)

|      | 1        | 2        | 3        | 4        | 5        | 6        | 7        | 8        | 9        | 10       | 11       |
|------|----------|----------|----------|----------|----------|----------|----------|----------|----------|----------|----------|
| 1 C  | 0.000000 |          |          |          |          |          |          |          |          |          |          |
| 2 C  | 1.388623 | 0.000000 |          |          |          |          |          |          |          |          |          |
| 3 C  | 2.709205 | 2.271168 | 0.000000 |          |          |          |          |          |          |          |          |
| 4 C  | 2.382702 | 2.709205 | 1.388623 | 0.000000 |          |          |          |          |          |          |          |
| 5 C  | 1.386299 | 2.384191 | 2.384191 | 1.386299 | 0.000000 |          |          |          |          |          |          |
| 6 H  | 1.083295 | 2.148881 | 3.791540 | 3.377991 | 2.157643 | 0.000000 |          |          |          |          |          |
| 7 H  | 2.151913 | 1.086022 | 3.239160 | 3.794835 | 3.375842 | 2.482836 | 0.000000 |          |          |          |          |
| 8 H  | 3.794835 | 3.239160 | 1.086022 | 2.151913 | 3.375842 | 4.876668 | 4.100405 | 0.000000 |          |          |          |
| 9 H  | 3.377990 | 3.791540 | 2.148881 | 1.083295 | 2.157643 | 4.296506 | 4.876668 | 2.482836 | 0.000000 |          |          |
| 10 H | 2.152612 | 3.377038 | 3.377038 | 2.152611 | 1.084002 | 2.503280 | 4.287878 | 4.287878 | 2.503280 | 0.000000 |          |
| 11 N | 2.396606 | 1.329827 | 1.329827 | 2.396606 | 2.788399 | 3.362922 | 2.052963 | 2.052963 | 3.362922 | 3.872401 | 0.000000 |

### Internal coordinates for the vibrationally average structure at 0K (Sz)

|      | 1        | 2        | 3        | 4        | 5        | 6        | 7        | 8        | 9        | 10       | 11       |
|------|----------|----------|----------|----------|----------|----------|----------|----------|----------|----------|----------|
| 1 C  | 0.000000 |          |          |          |          |          |          |          |          |          |          |
| 2 C  | 1.395421 | 0.000000 |          |          |          |          |          |          |          |          |          |
| 3 C  | 2.726050 | 2.285902 | 0.000000 |          |          |          |          |          |          |          |          |
| 4 C  | 2.399118 | 2.726050 | 1.395421 | 0.000000 |          |          |          |          |          |          |          |
| 5 C  | 1.392895 | 2.392853 | 2.392853 | 1.392895 | 0.000000 |          |          |          |          |          |          |
| 6 H  | 1.087163 | 2.160073 | 3.812379 | 3.396910 | 2.167378 | 0.000000 |          |          |          |          |          |
| 7 H  | 2.164032 | 1.091155 | 3.257050 | 3.816704 | 3.391007 | 2.499751 | 0.000000 |          |          |          |          |
| 8 H  | 3.816702 | 3.257048 | 1.091154 | 2.164031 | 3.391005 | 4.902510 | 4.119927 | 0.000000 |          |          |          |
| 9 H  | 3.396910 | 3.812379 | 2.160074 | 1.087163 | 2.167378 | 4.317033 | 4.902512 | 2.499751 | 0.000000 |          |          |
| 10 H | 2.160048 | 3.389158 | 3.389158 | 2.160047 | 1.088381 | 2.511632 | 4.306602 | 4.306601 | 2.511631 | 0.000000 |          |
| 11 N | 2.405044 | 1.335216 | 1.335216 | 2.405044 | 2.792503 | 3.376701 | 2.062337 | 2.062336 | 3.376701 | 3.880884 | 0.000000 |

### Internal coordinates for the vibr. average structure at 298.15K (Sa)

|      | 1        | 2        | 3        | 4        | 5        | 6        | 7        | 8        | 9        | 10       | 11       |
|------|----------|----------|----------|----------|----------|----------|----------|----------|----------|----------|----------|
| 1 C  | 0.000000 |          |          |          |          |          |          |          |          |          |          |
| 2 C  | 1.395321 | 0.000000 |          |          |          |          |          |          |          |          |          |
| 3 C  | 2.726183 | 2.286062 | 0.000000 |          |          |          |          |          |          |          |          |
| 4 C  | 2.399389 | 2.726183 | 1.395321 | 0.000000 |          |          |          |          |          |          |          |
| 5 C  | 1.392823 | 2.392474 | 2.392474 | 1.392823 | 0.000000 |          |          |          |          |          |          |
| 6 H  | 1.086673 | 2.159727 | 3.812032 | 3.396641 | 2.166947 | 0.000000 |          |          |          |          |          |
| 7 H  | 2.163588 | 1.090585 | 3.256579 | 3.816257 | 3.390231 | 2.499534 | 0.000000 |          |          |          |          |
| 8 H  | 3.816256 | 3.256577 | 1.090583 | 2.163587 | 3.390229 | 4.901584 | 4.118842 | 0.000000 |          |          |          |
| 9 H  | 3.396641 | 3.812032 | 2.159727 | 1.086673 | 2.166947 | 4.316229 | 4.901586 | 2.499534 | 0.000000 |          |          |
| 10 H | 2.159385 | 3.388253 | 3.388253 | 2.159384 | 1.087866 | 2.510849 | 4.305397 | 4.305395 | 2.510848 | 0.000000 |          |
| 11 N | 2.404710 | 1.335098 | 1.335098 | 2.404710 | 2.791667 | 3.376062 | 2.061782 | 2.061781 | 3.376062 | 3.879533 | 0.000000 |

### Pyridine, m062x/aug-cc-pvdz

#### Electric dipole

-----  
Property at reference geometry, Unit: Debye

-----  
X= 2.2469 Y= 0.0000 Z= 0.0000

-----  
Temperature: 0K, Unit: Debye

-----  
X= 2.2000 Y= 0.0000 Z= 0.0000

-----  
Temperature: 298K, Unit: Debye

-----  
X= 2.1976 Y= -0.0000 Z= 0.0001

### Internal coordinates for the Equilibrium structure (Se)

|      | 1        | 2        | 3        | 4        | 5        | 6        | 7        | 8        | 9        | 10       | 11       |
|------|----------|----------|----------|----------|----------|----------|----------|----------|----------|----------|----------|
| 1 C  | 0.000000 |          |          |          |          |          |          |          |          |          |          |
| 2 C  | 1.395208 | 0.000000 |          |          |          |          |          |          |          |          |          |
| 3 C  | 2.720887 | 2.280644 | 0.000000 |          |          |          |          |          |          |          |          |
| 4 C  | 2.392579 | 2.720887 | 1.395208 | 0.000000 |          |          |          |          |          |          |          |
| 5 C  | 1.392139 | 2.394979 | 2.394979 | 1.392139 | 0.000000 |          |          |          |          |          |          |
| 6 H  | 1.088509 | 2.158281 | 3.808369 | 3.393165 | 2.168021 | 0.000000 |          |          |          |          |          |
| 7 H  | 2.161252 | 1.091214 | 3.253913 | 3.811750 | 3.390737 | 2.491954 | 0.000000 |          |          |          |          |
| 8 H  | 3.811750 | 3.253913 | 1.091214 | 2.161252 | 3.390737 | 4.898734 | 4.120417 | 0.000000 |          |          |          |
| 9 H  | 3.393165 | 3.808369 | 2.158281 | 1.088509 | 2.168021 | 4.316981 | 4.898734 | 2.491954 | 0.000000 |          |          |
| 10 H | 2.162554 | 3.392982 | 3.392982 | 2.162554 | 1.089537 | 2.515925 | 4.307272 | 4.307272 | 2.515925 | 0.000000 |          |
| 11 N | 2.407900 | 1.335748 | 1.335748 | 2.407900 | 2.801704 | 3.378172 | 2.063071 | 2.063071 | 3.378172 | 3.891241 | 0.000000 |

### Internal coordinates for the vibrationally average structure at 0K (Sz)

|      | 1        | 2        | 3        | 4        | 5        | 6        | 7        | 8        | 9        | 10       | 11       |
|------|----------|----------|----------|----------|----------|----------|----------|----------|----------|----------|----------|
| 1 C  | 0.000000 |          |          |          |          |          |          |          |          |          |          |
| 2 C  | 1.400650 | 0.000000 |          |          |          |          |          |          |          |          |          |
| 3 C  | 2.731352 | 2.288741 | 0.000000 |          |          |          |          |          |          |          |          |
| 4 C  | 2.402397 | 2.731352 | 1.400650 | 0.000000 |          |          |          |          |          |          |          |
| 5 C  | 1.397670 | 2.403923 | 2.403923 | 1.397670 | 0.000000 |          |          |          |          |          |          |
| 6 H  | 1.092972 | 2.167537 | 3.823316 | 3.406863 | 2.176510 | 0.000000 |          |          |          |          |          |
| 7 H  | 2.170338 | 1.097005 | 3.267469 | 3.828017 | 3.404767 | 2.502618 | 0.000000 |          |          |          |          |
| 8 H  | 3.828017 | 3.267469 | 1.097005 | 2.170338 | 3.404767 | 4.919497 | 4.138928 | 0.000000 |          |          |          |
| 9 H  | 3.406863 | 3.823316 | 2.167537 | 1.092972 | 2.176510 | 4.334057 | 4.919497 | 2.502618 | 0.000000 |          |          |
| 10 H | 2.170506 | 3.405359 | 3.405359 | 2.170506 | 1.093255 | 2.525101 | 4.324259 | 4.324259 | 2.525101 | 0.000000 |          |
| 11 N | 2.416043 | 1.339810 | 1.339810 | 2.416043 | 2.810846 | 3.390749 | 2.072238 | 2.072238 | 3.390749 | 3.904100 | 0.000000 |

### Internal coordinates for the vibr. average structure at 298.15K (Sa)

|      | 1        | 2        | 3        | 4        | 5        | 6        | 7        | 8        | 9        | 10       | 11       |
|------|----------|----------|----------|----------|----------|----------|----------|----------|----------|----------|----------|
| 1 C  | 0.000000 |          |          |          |          |          |          |          |          |          |          |
| 2 C  | 1.400459 | 0.000000 |          |          |          |          |          |          |          |          |          |
| 3 C  | 2.731083 | 2.288500 | 0.000000 |          |          |          |          |          |          |          |          |
| 4 C  | 2.402241 | 2.731083 | 1.400459 | 0.000000 |          |          |          |          |          |          |          |
| 5 C  | 1.397513 | 2.403540 | 2.403540 | 1.397513 | 0.000000 |          |          |          |          |          |          |
| 6 H  | 1.092482 | 2.167021 | 3.822561 | 3.406222 | 2.175966 | 0.000000 |          |          |          |          |          |
| 7 H  | 2.169724 | 1.096470 | 3.266722 | 3.827212 | 3.403913 | 2.502011 | 0.000000 |          |          |          |          |
| 8 H  | 3.827213 | 3.266722 | 1.096470 | 2.169724 | 3.403913 | 4.918207 | 4.137742 | 0.000000 |          |          |          |
| 9 H  | 3.406222 | 3.822561 | 2.167021 | 1.092482 | 2.175966 | 4.332966 | 4.918207 | 2.502011 | 0.000000 |          |          |
| 10 H | 2.169875 | 3.404473 | 3.404473 | 2.169875 | 1.092727 | 2.524356 | 4.322966 | 4.322966 | 2.524356 | 0.000000 |          |
| 11 N | 2.415687 | 1.339617 | 1.339617 | 2.415687 | 2.810303 | 3.389993 | 2.071650 | 2.071650 | 3.389993 | 3.903030 | 0.000000 |

### Pyridine, m062x/aug-cc-pvtz

#### Electric dipole

-----  
Property at reference geometry, Unit: Debye  
-----

X= 2.2535 Y= 0.0000 Z= 0.0000  
-----

Temperature: 0K, Unit: Debye  
-----

X= 2.2063 Y= 0.0000 Z= -0.0000  
-----

Temperature: 298K, Unit: Debye  
-----

X= 2.2041 Y= 0.0000 Z= 0.0001  
-----

### Internal coordinates for the Equilibrium structure (Se)

|      | 1        | 2        | 3        | 4        | 5        | 6        | 7        | 8        | 9        | 10       | 11       |
|------|----------|----------|----------|----------|----------|----------|----------|----------|----------|----------|----------|
| 1 C  | 0.000000 |          |          |          |          |          |          |          |          |          |          |
| 2 C  | 1.388122 | 0.000000 |          |          |          |          |          |          |          |          |          |
| 3 C  | 2.709582 | 2.273050 | 0.000000 |          |          |          |          |          |          |          |          |
| 4 C  | 2.382241 | 2.709582 | 1.388121 | 0.000000 |          |          |          |          |          |          |          |
| 5 C  | 1.385408 | 2.383047 | 2.383047 | 1.385409 | 0.000000 |          |          |          |          |          |          |
| 6 H  | 1.080673 | 2.145703 | 3.789305 | 3.375091 | 2.155146 | 0.000000 |          |          |          |          |          |
| 7 H  | 2.149211 | 1.083703 | 3.239423 | 3.792919 | 3.372289 | 2.478487 | 0.000000 |          |          |          |          |
| 8 H  | 3.792920 | 3.239423 | 1.083703 | 2.149211 | 3.372289 | 4.872160 | 4.099975 | 0.000000 |          |          |          |
| 9 H  | 3.375091 | 3.789305 | 2.145703 | 1.080673 | 2.155146 | 4.291499 | 4.872160 | 2.478488 | 0.000000 |          |          |
| 10 H | 2.149419 | 3.373460 | 3.373460 | 2.149419 | 1.081677 | 2.499914 | 4.281949 | 4.281949 | 2.499914 | 0.000000 |          |
| 11 N | 2.395430 | 1.330231 | 1.330231 | 2.395430 | 2.785820 | 3.359374 | 2.052839 | 2.052839 | 3.359374 | 3.867496 | 0.000000 |

### Internal coordinates for the vibrationally average structure at 0K (Sz)

|      | 1        | 2        | 3        | 4        | 5        | 6        | 7        | 8        | 9        | 10       | 11       |
|------|----------|----------|----------|----------|----------|----------|----------|----------|----------|----------|----------|
| 1 C  | 0.000000 |          |          |          |          |          |          |          |          |          |          |
| 2 C  | 1.393650 | 0.000000 |          |          |          |          |          |          |          |          |          |
| 3 C  | 2.720123 | 2.281237 | 0.000000 |          |          |          |          |          |          |          |          |
| 4 C  | 2.392040 | 2.720123 | 1.393649 | 0.000000 |          |          |          |          |          |          |          |
| 5 C  | 1.390860 | 2.391967 | 2.391967 | 1.390860 | 0.000000 |          |          |          |          |          |          |
| 6 H  | 1.085126 | 2.154971 | 3.804315 | 3.388779 | 2.163636 | 0.000000 |          |          |          |          |          |
| 7 H  | 2.158383 | 1.089511 | 3.253104 | 3.809282 | 3.386302 | 2.489144 | 0.000000 |          |          |          |          |
| 8 H  | 3.809283 | 3.253104 | 1.089511 | 2.158383 | 3.386303 | 4.893004 | 4.118666 | 0.000000 |          |          |          |
| 9 H  | 3.388778 | 3.804315 | 2.154970 | 1.085126 | 2.163636 | 4.308591 | 4.893003 | 2.489144 | 0.000000 |          |          |
| 10 H | 2.157676 | 3.386286 | 3.386286 | 2.157676 | 1.085907 | 2.509317 | 4.299350 | 4.299351 | 2.509316 | 0.000000 |          |
| 11 N | 2.403654 | 1.334336 | 1.334337 | 2.403654 | 2.794917 | 3.371987 | 2.062098 | 2.062099 | 3.371987 | 3.880824 | 0.000000 |

### Internal coordinates for the vibr. average structure at 298.15K (Sa)

|      | 1        | 2        | 3        | 4        | 5        | 6        | 7        | 8        | 9        | 10       | 11       |
|------|----------|----------|----------|----------|----------|----------|----------|----------|----------|----------|----------|
| 1 C  | 0.000000 |          |          |          |          |          |          |          |          |          |          |
| 2 C  | 1.393464 | 0.000000 |          |          |          |          |          |          |          |          |          |
| 3 C  | 2.719856 | 2.280997 | 0.000000 |          |          |          |          |          |          |          |          |
| 4 C  | 2.391881 | 2.719856 | 1.393463 | 0.000000 |          |          |          |          |          |          |          |
| 5 C  | 1.390699 | 2.391586 | 2.391586 | 1.390700 | 0.000000 |          |          |          |          |          |          |
| 6 H  | 1.084660 | 2.154483 | 3.803586 | 3.388155 | 2.163106 | 0.000000 |          |          |          |          |          |
| 7 H  | 2.157776 | 1.088986 | 3.252371 | 3.808488 | 3.385453 | 2.488554 | 0.000000 |          |          |          |          |
| 8 H  | 3.808489 | 3.252371 | 1.088986 | 2.157776 | 3.385454 | 4.891750 | 4.117509 | 0.000000 |          |          |          |
| 9 H  | 3.388154 | 3.803585 | 2.154482 | 1.084660 | 2.163106 | 4.307533 | 4.891748 | 2.488555 | 0.000000 |          |          |
| 10 H | 2.157058 | 3.385421 | 3.385421 | 2.157059 | 1.085400 | 2.508585 | 4.298078 | 4.298079 | 2.508584 | 0.000000 |          |
| 11 N | 2.403310 | 1.334149 | 1.334150 | 2.403310 | 2.794385 | 3.371266 | 2.061525 | 2.061526 | 3.371266 | 3.879784 | 0.000000 |

### Pyridine, mp2fc/aug-cc-pvdz

#### Electric dipole

Property at reference geometry, Unit: Debye

X= 2.3508 Y= 0.0000 Z= -0.0000

Temperature: 0K, Unit: Debye

X= 2.2981 Y= 0.0000 Z= -0.0000

Temperature: 298K, Unit: Debye

X= 2.2955 Y= 0.0000 Z= -0.0000

### Internal coordinates for the Equilibrium structure (Se)

|      | 1        | 2        | 3        | 4        | 5        | 6        | 7        | 8        | 9        | 10       | 11       |
|------|----------|----------|----------|----------|----------|----------|----------|----------|----------|----------|----------|
| 1 C  | 0.000000 |          |          |          |          |          |          |          |          |          |          |
| 2 C  | 1.406703 | 0.000000 |          |          |          |          |          |          |          |          |          |
| 3 C  | 2.744738 | 2.304254 | 0.000000 |          |          |          |          |          |          |          |          |
| 4 C  | 2.410660 | 2.744738 | 1.406703 | 0.000000 |          |          |          |          |          |          |          |
| 5 C  | 1.404895 | 2.419378 | 2.419378 | 1.404895 | 0.000000 |          |          |          |          |          |          |
| 6 H  | 1.093584 | 2.171495 | 3.837303 | 3.415794 | 2.182122 | 0.000000 |          |          |          |          |          |
| 7 H  | 2.175963 | 1.094986 | 3.280745 | 3.839371 | 3.418311 | 2.507739 | 0.000000 |          |          |          |          |
| 8 H  | 3.839371 | 3.280745 | 1.094986 | 2.175963 | 3.418311 | 4.931443 | 4.150712 | 0.000000 |          |          |          |
| 9 H  | 3.415794 | 3.837303 | 2.171495 | 1.093584 | 2.182122 | 4.343925 | 4.931443 | 2.507739 | 0.000000 |          |          |
| 10 H | 2.179350 | 3.421222 | 3.421222 | 2.179350 | 1.093953 | 2.533488 | 4.338707 | 4.338707 | 2.533488 | 0.000000 |          |
| 11 N | 2.433923 | 1.352707 | 1.352707 | 2.433923 | 2.836253 | 3.407774 | 2.078825 | 2.078825 | 3.407774 | 3.930207 | 0.000000 |

### Internal coordinates for the vibrationally average structure at 0K (Sz)

|      | 1        | 2        | 3        | 4        | 5        | 6        | 7        | 8        | 9        | 10       | 11       |
|------|----------|----------|----------|----------|----------|----------|----------|----------|----------|----------|----------|
| 1 C  | 0.000000 |          |          |          |          |          |          |          |          |          |          |
| 2 C  | 1.412493 | 0.000000 |          |          |          |          |          |          |          |          |          |
| 3 C  | 2.756052 | 2.313504 | 0.000000 |          |          |          |          |          |          |          |          |
| 4 C  | 2.420866 | 2.756052 | 1.412493 | 0.000000 |          |          |          |          |          |          |          |
| 5 C  | 1.410356 | 2.428512 | 2.428512 | 1.410356 | 0.000000 |          |          |          |          |          |          |
| 6 H  | 1.097248 | 2.179966 | 3.852285 | 3.429277 | 2.190351 | 0.000000 |          |          |          |          |          |
| 7 H  | 2.185837 | 1.099834 | 3.293827 | 3.855502 | 3.432396 | 2.519146 | 0.000000 |          |          |          |          |
| 8 H  | 3.855502 | 3.293827 | 1.099834 | 2.185838 | 3.432396 | 4.951224 | 4.166694 | 0.000000 |          |          |          |
| 9 H  | 3.429277 | 3.852285 | 2.179966 | 1.097248 | 2.190351 | 4.360418 | 4.951224 | 2.519146 | 0.000000 |          |          |
| 10 H | 2.186983 | 3.433654 | 3.433654 | 2.186983 | 1.097620 | 2.542556 | 4.355954 | 4.355954 | 2.542556 | 0.000000 |          |
| 11 N | 2.443003 | 1.357572 | 1.357572 | 2.443003 | 2.845902 | 3.420301 | 2.086691 | 2.086691 | 3.420301 | 3.943523 | 0.000000 |

### Internal coordinates for the vibr. average structure at 298.15K (Sa)

|      | 1        | 2        | 3        | 4        | 5        | 6        | 7        | 8        | 9        | 10       | 11       |
|------|----------|----------|----------|----------|----------|----------|----------|----------|----------|----------|----------|
| 1 C  | 0.000000 |          |          |          |          |          |          |          |          |          |          |
| 2 C  | 1.412290 | 0.000000 |          |          |          |          |          |          |          |          |          |
| 3 C  | 2.755768 | 2.313279 | 0.000000 |          |          |          |          |          |          |          |          |
| 4 C  | 2.420674 | 2.755768 | 1.412290 | 0.000000 |          |          |          |          |          |          |          |
| 5 C  | 1.410162 | 2.428088 | 2.428088 | 1.410162 | 0.000000 |          |          |          |          |          |          |
| 6 H  | 1.096732 | 2.179399 | 3.851489 | 3.428581 | 2.189772 | 0.000000 |          |          |          |          |          |
| 7 H  | 2.185209 | 1.099252 | 3.293034 | 3.854634 | 3.431476 | 2.518515 | 0.000000 |          |          |          |          |
| 8 H  | 3.854634 | 3.293034 | 1.099252 | 2.185209 | 3.431476 | 4.949844 | 4.165395 | 0.000000 |          |          |          |
| 9 H  | 3.428581 | 3.851489 | 2.179399 | 1.096732 | 2.189772 | 4.359260 | 4.949844 | 2.518515 | 0.000000 |          |          |
| 10 H | 2.186284 | 3.432695 | 3.432695 | 2.186284 | 1.097062 | 2.541758 | 4.354572 | 4.354572 | 2.541758 | 0.000000 |          |
| 11 N | 2.442623 | 1.357383 | 1.357383 | 2.442623 | 2.845303 | 3.419491 | 2.086046 | 2.086046 | 3.419491 | 3.942365 | 0.000000 |

### Pyridine mp2fc/aug-cc-pvtz

#### Electric dipole

-----  
Property at reference geometry, Unit: Debye

-----  
X= -0.0000 Y= 0.0000 Z= -2.3347

-----  
Temperature: 0K, Unit: Debye

-----  
X= 0.0000 Y= 0.0000 Z= -2.2849

-----  
Temperature: 298K, Unit: Debye

-----  
X= 0.0001 Y= -0.0000 Z= -2.2826

### Internal coordinates for the Equilibrium structure (Se)

|      | 1        | 2        | 3        | 4        | 5        | 6        | 7        | 8        | 9        | 10       | 11       |
|------|----------|----------|----------|----------|----------|----------|----------|----------|----------|----------|----------|
| 1 C  | 0.000000 |          |          |          |          |          |          |          |          |          |          |
| 2 C  | 1.392930 | 0.000000 |          |          |          |          |          |          |          |          |          |
| 3 C  | 2.720233 | 2.285276 | 0.000000 |          |          |          |          |          |          |          |          |
| 4 C  | 2.388952 | 2.720233 | 1.392930 | 0.000000 |          |          |          |          |          |          |          |
| 5 C  | 1.391253 | 2.395371 | 2.395371 | 1.391253 | 0.000000 |          |          |          |          |          |          |
| 6 H  | 1.081509 | 2.149229 | 3.800785 | 3.382640 | 2.159940 | 0.000000 |          |          |          |          |          |
| 7 H  | 2.154576 | 1.083587 | 3.251444 | 3.803455 | 3.384305 | 2.483098 | 0.000000 |          |          |          |          |
| 8 H  | 3.803455 | 3.251444 | 1.083587 | 2.154576 | 3.384305 | 4.883525 | 4.112294 | 0.000000 |          |          |          |
| 9 H  | 3.382640 | 3.800785 | 2.149229 | 1.081509 | 2.159940 | 4.300042 | 4.883525 | 2.483098 | 0.000000 |          |          |
| 10 H | 2.156284 | 3.385811 | 3.385811 | 2.156284 | 1.081902 | 2.506638 | 4.294242 | 4.294242 | 2.506638 | 0.000000 |          |
| 11 N | 2.409983 | 1.340623 | 1.340623 | 2.409983 | 2.806452 | 3.373574 | 2.059551 | 2.059551 | 3.373574 | 3.888354 | 0.000000 |

### Internal coordinates for the vibrationally average structure at 0K (Sz)

|      | 1        | 2        | 3        | 4        | 5        | 6        | 7        | 8        | 9        | 10       | 11       |
|------|----------|----------|----------|----------|----------|----------|----------|----------|----------|----------|----------|
| 1 C  | 0.000000 |          |          |          |          |          |          |          |          |          |          |
| 2 C  | 1.398680 | 0.000000 |          |          |          |          |          |          |          |          |          |
| 3 C  | 2.731257 | 2.294452 | 0.000000 |          |          |          |          |          |          |          |          |
| 4 C  | 2.398593 | 2.731257 | 1.398680 | 0.000000 |          |          |          |          |          |          |          |
| 5 C  | 1.396637 | 2.404745 | 2.404745 | 1.396637 | 0.000000 |          |          |          |          |          |          |
| 6 H  | 1.085408 | 2.157718 | 3.815708 | 3.395807 | 2.168149 | 0.000000 |          |          |          |          |          |
| 7 H  | 2.164160 | 1.088601 | 3.264944 | 3.819482 | 3.398449 | 2.493843 | 0.000000 |          |          |          |          |
| 8 H  | 3.819482 | 3.264944 | 1.088601 | 2.164160 | 3.398449 | 4.903444 | 4.129443 | 0.000000 |          |          |          |
| 9 H  | 3.395807 | 3.815708 | 2.157718 | 1.085408 | 2.168149 | 4.316444 | 4.903444 | 2.493843 | 0.000000 |          |          |
| 10 H | 2.164313 | 3.398828 | 3.398828 | 2.164313 | 1.085909 | 2.515981 | 4.311741 | 4.311741 | 2.515981 | 0.000000 |          |
| 11 N | 2.418895 | 1.345457 | 1.345457 | 2.418895 | 2.816392 | 3.386088 | 2.068037 | 2.068037 | 3.386088 | 3.902301 | 0.000000 |

### Internal coordinates for the vibr. average structure at 298.15K (Sa)

|      | 1        | 2        | 3        | 4        | 5        | 6        | 7        | 8        | 9        | 10       | 11       |
|------|----------|----------|----------|----------|----------|----------|----------|----------|----------|----------|----------|
| 1 C  | 0.000000 |          |          |          |          |          |          |          |          |          |          |
| 2 C  | 1.398488 | 0.000000 |          |          |          |          |          |          |          |          |          |
| 3 C  | 2.730981 | 2.294233 | 0.000000 |          |          |          |          |          |          |          |          |
| 4 C  | 2.398400 | 2.730981 | 1.398488 | 0.000000 |          |          |          |          |          |          |          |
| 5 C  | 1.396460 | 2.404361 | 2.404361 | 1.396460 | 0.000000 |          |          |          |          |          |          |
| 6 H  | 1.084922 | 2.157180 | 3.814949 | 3.395141 | 2.167603 | 0.000000 |          |          |          |          |          |
| 7 H  | 2.163549 | 1.088039 | 3.264183 | 3.818642 | 3.397577 | 2.493223 | 0.000000 |          |          |          |          |
| 8 H  | 3.818642 | 3.264183 | 1.088039 | 2.163549 | 3.397577 | 4.902121 | 4.128205 | 0.000000 |          |          |          |
| 9 H  | 3.395141 | 3.814949 | 2.157180 | 1.084922 | 2.167603 | 4.315347 | 4.902121 | 2.493223 | 0.000000 |          |          |
| 10 H | 2.163661 | 3.397932 | 3.397932 | 2.163661 | 1.085375 | 2.515235 | 4.310427 | 4.310427 | 2.515235 | 0.000000 |          |
| 11 N | 2.418536 | 1.345277 | 1.345277 | 2.418536 | 2.815849 | 3.385321 | 2.067424 | 2.067424 | 3.385321 | 3.901224 | 0.000000 |

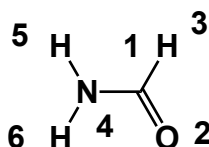

### Formamide, hf/aug-cc-pvdz

#### Electric dipole

Property at reference geometry, Unit: Debye

X= 4.0088 Y= 1.1076 Z= 0.0000

Temperature: 0K, Unit: Debye

X= 3.7374 Y= 1.1133 Z= 0.0000

Temperature: 298K, Unit: Debye

X= 3.3772 Y= 1.1553 Z= -0.0632

### Internal coordinates for the Equilibrium structure (Se)

|     | 1        | 2        | 3        | 4        | 5        | 6        |
|-----|----------|----------|----------|----------|----------|----------|
| 1 C | 0.000000 |          |          |          |          |          |
| 2 O | 1.194457 | 0.000000 |          |          |          |          |
| 3 H | 1.097081 | 2.006361 | 0.000000 |          |          |          |
| 4 N | 1.350324 | 2.256367 | 2.046040 | 0.000000 |          |          |
| 5 H | 2.033800 | 2.523593 | 2.944736 | 0.996143 | 0.000000 |          |
| 6 H | 2.048957 | 3.135943 | 2.299187 | 0.993285 | 1.717963 | 0.000000 |

### Internal coordinates for the vibrationally average structure at 0K (Sz)

|     | 1        | 2        | 3        | 4        | 5        | 6        |
|-----|----------|----------|----------|----------|----------|----------|
| 1 C | 0.000000 |          |          |          |          |          |
| 2 O | 1.195320 | 0.000000 |          |          |          |          |
| 3 H | 1.106732 | 2.014887 | 0.000000 |          |          |          |
| 4 N | 1.364430 | 2.268412 | 2.068293 | 0.000000 |          |          |
| 5 H | 2.022637 | 2.508605 | 2.946024 | 0.984554 | 0.000000 |          |
| 6 H | 2.032023 | 3.117182 | 2.297048 | 0.966323 | 1.703396 | 0.000000 |

### Internal coordinates for the vibr. average structure at 298.15K (Sa)

|     | 1        | 2        | 3        | 4        | 5        | 6        |
|-----|----------|----------|----------|----------|----------|----------|
| 1 C | 0.000000 |          |          |          |          |          |
| 2 O | 1.192923 | 0.000000 |          |          |          |          |
| 3 H | 1.106828 | 2.012057 | 0.000000 |          |          |          |
| 4 N | 1.375394 | 2.275448 | 2.079751 | 0.000000 |          |          |
| 5 H | 1.990070 | 2.469831 | 2.919781 | 0.963352 | 0.000000 |          |
| 6 H | 1.987778 | 3.068020 | 2.268378 | 0.916286 | 1.671599 | 0.000000 |

### Formamide, hf/aug-cc-pvtz

#### Electric dipole

-----  
Property at reference geometry, Unit: Debye  
-----

X= 3.9731 Y= 1.0861 Z= 0.0000  
-----

Temperature: 0K, Unit: Debye  
-----

X= 3.7328 Y= 1.0890 Z= 0.0000  
-----

Temperature: 298K, Unit: Debye  
-----

X= 3.4810 Y= 1.1197 Z= -0.0474

### Internal coordinates for the Equilibrium structure (Se)

|     | 1        | 2        | 3        | 4        | 5        | 6        |
|-----|----------|----------|----------|----------|----------|----------|
| 1 C | 0.000000 |          |          |          |          |          |
| 2 O | 1.187913 | 0.000000 |          |          |          |          |
| 3 H | 1.091022 | 1.995413 | 0.000000 |          |          |          |
| 4 N | 1.346079 | 2.248060 | 2.036049 | 0.000000 |          |          |
| 5 H | 2.027513 | 2.517140 | 2.931547 | 0.991718 | 0.000000 |          |
| 6 H | 2.041520 | 3.123114 | 2.288187 | 0.988791 | 1.709123 | 0.000000 |

### Internal coordinates for the vibrationally average structure at 0K (Sz)

|     | 1        | 2        | 3        | 4        | 5        | 6        |
|-----|----------|----------|----------|----------|----------|----------|
| 1 C | 0.000000 |          |          |          |          |          |
| 2 O | 1.188901 | 0.000000 |          |          |          |          |
| 3 H | 1.100664 | 2.004230 | 0.000000 |          |          |          |
| 4 N | 1.359494 | 2.259605 | 2.057453 | 0.000000 |          |          |
| 5 H | 2.018804 | 2.504872 | 2.934786 | 0.981806 | 0.000000 |          |
| 6 H | 2.028840 | 3.108814 | 2.289013 | 0.966125 | 1.697245 | 0.000000 |

### Internal coordinates for the vibr. average structure at 298.15K (Sa)

|     | 1        | 2        | 3        | 4        | 5        | 6        |
|-----|----------|----------|----------|----------|----------|----------|
| 1 C | 0.000000 |          |          |          |          |          |
| 2 O | 1.187195 | 0.000000 |          |          |          |          |
| 3 H | 1.100669 | 2.002333 | 0.000000 |          |          |          |
| 4 N | 1.367532 | 2.264755 | 2.065637 | 0.000000 |          |          |
| 5 H | 1.995912 | 2.477539 | 2.916192 | 0.966396 | 0.000000 |          |
| 6 H | 1.998324 | 3.074721 | 2.269243 | 0.931016 | 1.674860 | 0.000000 |

## Formamide, b3lyp/aug-cc-pvdz

### Electric dipole

-----  
Property at reference geometry, Unit: Debye

-----  
X= -3.8863 Y= 0.8291 Z= 0.0000

-----  
Temperature: 0K, Unit: Debye

-----  
X= -3.7093 Y= 0.8179 Z= 0.0000

-----  
Temperature: 298K, Unit: Debye

-----  
X= -3.6114 Y= 0.8319 Z= -0.0221

### Internal coordinates for the Equilibrium structure (Se)

|     | 1        | 2        | 3        | 4        | 5        | 6        |
|-----|----------|----------|----------|----------|----------|----------|
| 1 C | 0.000000 |          |          |          |          |          |
| 2 O | 1.217970 | 0.000000 |          |          |          |          |
| 3 H | 1.111146 | 2.044299 | 0.000000 |          |          |          |
| 4 N | 1.362052 | 2.286342 | 2.062668 | 0.000000 |          |          |
| 5 H | 2.057085 | 2.555219 | 2.976985 | 1.011233 | 0.000000 |          |
| 6 H | 2.073693 | 3.181989 | 2.319505 | 1.008639 | 1.742688 | 0.000000 |

### Internal coordinates for the vibrationally average structure at 0K (Sz)

|     | 1        | 2        | 3        | 4        | 5        | 6        |
|-----|----------|----------|----------|----------|----------|----------|
| 1 C | 0.000000 |          |          |          |          |          |
| 2 O | 1.220033 | 0.000000 |          |          |          |          |
| 3 H | 1.121832 | 2.055309 | 0.000000 |          |          |          |
| 4 N | 1.373217 | 2.296995 | 2.082267 | 0.000000 |          |          |
| 5 H | 2.054927 | 2.550929 | 2.986378 | 1.006182 | 0.000000 |          |
| 6 H | 2.068124 | 3.176607 | 2.324152 | 0.995237 | 1.737863 | 0.000000 |

### Internal coordinates for the vibr. average structure at 298.15K (Sa)

|     | 1        | 2        | 3        | 4        | 5        | 6        |
|-----|----------|----------|----------|----------|----------|----------|
| 1 C | 0.000000 |          |          |          |          |          |
| 2 O | 1.219413 | 0.000000 |          |          |          |          |
| 3 H | 1.121754 | 2.054252 | 0.000000 |          |          |          |
| 4 N | 1.376203 | 2.299109 | 2.085368 | 0.000000 |          |          |
| 5 H | 2.044484 | 2.539321 | 2.977676 | 0.998813 | 0.000000 |          |
| 6 H | 2.053911 | 3.161178 | 2.314683 | 0.979495 | 1.727191 | 0.000000 |

## Formamide, b3lyp/aug-cc-pvdz temp = 423 K

### Electric dipole

-----  
Property at reference geometry, Unit: Debye

-----  
X= -3.8863 Y= 0.8291 Z= 0.0000

-----  
Temperature: 0K, Unit: Debye

-----  
X= -3.7093 Y= 0.8179 Z= 0.0000

-----  
Temperature: 423K, Unit: Debye

-----  
X= -3.5311 Y= 0.8410 Z= -0.0314



### Internal coordinates for the Equilibrium structure (Se)

|     | 1        | 2        | 3        | 4        | 5        | 6        |
|-----|----------|----------|----------|----------|----------|----------|
| 1 C | 0.000000 |          |          |          |          |          |
| 2 O | 1.217970 | 0.000000 |          |          |          |          |
| 3 H | 1.111146 | 2.044300 | 0.000000 |          |          |          |
| 4 N | 1.362052 | 2.286342 | 2.062668 | 0.000000 |          |          |
| 5 H | 2.057086 | 2.555219 | 2.976985 | 1.011233 | 0.000000 |          |
| 6 H | 2.073693 | 3.181989 | 2.319505 | 1.008640 | 1.742689 | 0.000000 |

### Internal coordinates for the vibrationally average structure at 0K (Sz)

|     | 1        | 2        | 3        | 4        | 5        | 6        |
|-----|----------|----------|----------|----------|----------|----------|
| 1 C | 0.000000 |          |          |          |          |          |
| 2 O | 1.220033 | 0.000000 |          |          |          |          |
| 3 H | 1.121832 | 2.055309 | 0.000000 |          |          |          |
| 4 N | 1.373218 | 2.296995 | 2.082267 | 0.000000 |          |          |
| 5 H | 2.054928 | 2.550930 | 2.986378 | 1.006183 | 0.000000 |          |
| 6 H | 2.068125 | 3.176608 | 2.324152 | 0.995238 | 1.737864 | 0.000000 |

### Internal coordinates for the vibr. average structure at 423.00K (Sa)

|     | 1        | 2        | 3        | 4        | 5        | 6        |
|-----|----------|----------|----------|----------|----------|----------|
| 1 C | 0.000000 |          |          |          |          |          |
| 2 O | 1.218884 | 0.000000 |          |          |          |          |
| 3 H | 1.121466 | 2.053126 | 0.000000 |          |          |          |
| 4 N | 1.378819 | 2.300985 | 2.087925 | 0.000000 |          |          |
| 5 H | 2.036071 | 2.530474 | 2.970235 | 0.992232 | 0.000000 |          |
| 6 H | 2.042518 | 3.148718 | 2.307245 | 0.966618 | 1.717369 | 0.000000 |

### Formamide, b3lyp/aug-cc-pvtz

#### Electric dipole

-----  
Property at reference geometry, Unit: Debye  
-----

X= -3.8643 Y= 0.8163 Z= 0.0000  
-----

Temperature: 0K, Unit: Debye  
-----

X= -3.6714 Y= 0.8086 Z= 0.0000  
-----

Temperature: 298K, Unit: Debye  
-----

X= -3.5404 Y= 0.8263 Z= -0.0274  
-----

### Internal coordinates for the Equilibrium structure (Se)

|     | 1        | 2        | 3        | 4        | 5        | 6        |
|-----|----------|----------|----------|----------|----------|----------|
| 1 C | 0.000000 |          |          |          |          |          |
| 2 O | 1.210790 | 0.000000 |          |          |          |          |
| 3 H | 1.103808 | 2.031484 | 0.000000 |          |          |          |
| 4 N | 1.356946 | 2.277346 | 2.050412 | 0.000000 |          |          |
| 5 H | 2.049626 | 2.548117 | 2.961285 | 1.006623 | 0.000000 |          |
| 6 H | 2.064636 | 3.167632 | 2.305232 | 1.003899 | 1.734255 | 0.000000 |

### Internal coordinates for the vibrationally average structure at 0K (Sz)

|     | 1        | 2        | 3        | 4        | 5        | 6        |
|-----|----------|----------|----------|----------|----------|----------|
| 1 C | 0.000000 |          |          |          |          |          |
| 2 O | 1.212687 | 0.000000 |          |          |          |          |
| 3 H | 1.114322 | 2.042141 | 0.000000 |          |          |          |
| 4 N | 1.368850 | 2.288395 | 2.070726 | 0.000000 |          |          |
| 5 H | 2.045382 | 2.541310 | 2.968866 | 0.999965 | 0.000000 |          |
| 6 H | 2.057314 | 3.160022 | 2.309224 | 0.987903 | 1.727279 | 0.000000 |

### Internal coordinates for the vibr. average structure at 298.15K (Sa)

|     | 1        | 2        | 3        | 4        | 5        | 6        |
|-----|----------|----------|----------|----------|----------|----------|
| 1 C | 0.000000 |          |          |          |          |          |
| 2 O | 1.211852 | 0.000000 |          |          |          |          |
| 3 H | 1.114219 | 2.040866 | 0.000000 |          |          |          |
| 4 N | 1.373047 | 2.291305 | 2.074992 | 0.000000 |          |          |
| 5 H | 2.031467 | 2.525626 | 2.957258 | 0.990153 | 0.000000 |          |
| 6 H | 2.038798 | 3.139817 | 2.296857 | 0.967236 | 1.713410 | 0.000000 |

### Formamide, b3lyp/aug-cc-pvtz temp = 423 K

#### Electric dipole

-----  
Property at reference geometry, Unit: Debye  
-----

X= -3.8643 Y= 0.8163 Z= 0.0000  
-----

Temperature: 0K, Unit: Debye  
-----

X= -3.6714 Y= 0.8086 Z= 0.0000  
-----

Temperature: 423K, Unit: Debye  
-----

X= -3.4403 Y= 0.8405 Z= -0.0388  
-----

### Internal coordinates for the Equilibrium structure (Se)

|     | 1        | 2        | 3        | 4        | 5        | 6        |
|-----|----------|----------|----------|----------|----------|----------|
| 1 C | 0.000000 |          |          |          |          |          |
| 2 O | 1.210790 | 0.000000 |          |          |          |          |
| 3 H | 1.103808 | 2.031484 | 0.000000 |          |          |          |
| 4 N | 1.356946 | 2.277346 | 2.050411 | 0.000000 |          |          |
| 5 H | 2.049626 | 2.548118 | 2.961285 | 1.006623 | 0.000000 |          |
| 6 H | 2.064637 | 3.167632 | 2.305231 | 1.003899 | 1.734255 | 0.000000 |

### Internal coordinates for the vibrationally average structure at 0K (Sz)

|     | 1        | 2        | 3        | 4        | 5        | 6        |
|-----|----------|----------|----------|----------|----------|----------|
| 1 C | 0.000000 |          |          |          |          |          |
| 2 O | 1.212687 | 0.000000 |          |          |          |          |
| 3 H | 1.114322 | 2.042142 | 0.000000 |          |          |          |
| 4 N | 1.368850 | 2.288395 | 2.070726 | 0.000000 |          |          |
| 5 H | 2.045382 | 2.541310 | 2.968866 | 0.999965 | 0.000000 |          |
| 6 H | 2.057314 | 3.160022 | 2.309222 | 0.987903 | 1.727279 | 0.000000 |

### Internal coordinates for the vibr. average structure at 423.00K (Sa)

|     | 1        | 2        | 3        | 4        | 5        | 6        |
|-----|----------|----------|----------|----------|----------|----------|
| 1 C | 0.000000 |          |          |          |          |          |
| 2 O | 1.211186 | 0.000000 |          |          |          |          |
| 3 H | 1.113913 | 2.039620 | 0.000000 |          |          |          |
| 4 N | 1.376444 | 2.293683 | 2.078294 | 0.000000 |          |          |
| 5 H | 2.020933 | 2.514265 | 2.948035 | 0.982123 | 0.000000 |          |
| 6 H | 2.024859 | 3.124493 | 2.287747 | 0.951402 | 1.701621 | 0.000000 |

### Formamide, b3lyp/aug-cc-pvqz

#### Electric dipole

-----  
Property at reference geometry, Unit: Debye  
-----

X= -3.8534 Y= 0.8137 Z= 0.0000  
-----

Temperature: 0K, Unit: Debye  
-----

X= -3.6653 Y= 0.8049 Z= 0.0000  
-----

Temperature: 298K, Unit: Debye  
-----

X= -3.5461 Y= 0.8208 Z= -0.0253  
-----

### Internal coordinates for the Equilibrium structure (Se)

|     | 1        | 2        | 3        | 4        | 5        | 6        |
|-----|----------|----------|----------|----------|----------|----------|
| 1 C | 0.000000 |          |          |          |          |          |
| 2 O | 1.209151 | 0.000000 |          |          |          |          |
| 3 H | 1.103671 | 2.030001 | 0.000000 |          |          |          |
| 4 N | 1.356453 | 2.275428 | 2.049815 | 0.000000 |          |          |
| 5 H | 2.048916 | 2.546548 | 2.960361 | 1.006126 | 0.000000 |          |
| 6 H | 2.063949 | 3.165325 | 2.304615 | 1.003425 | 1.733154 | 0.000000 |

### Internal coordinates for the vibrationally average structure at 0K (Sz)

|     | 1        | 2        | 3        | 4        | 5        | 6        |
|-----|----------|----------|----------|----------|----------|----------|
| 1 C | 0.000000 |          |          |          |          |          |
| 2 O | 1.211048 | 0.000000 |          |          |          |          |
| 3 H | 1.114227 | 2.040787 | 0.000000 |          |          |          |
| 4 N | 1.368187 | 2.286351 | 2.069873 | 0.000000 |          |          |
| 5 H | 2.045199 | 2.540362 | 2.968322 | 0.999833 | 0.000000 |          |
| 6 H | 2.057193 | 3.158351 | 2.308760 | 0.988163 | 1.726716 | 0.000000 |

### Internal coordinates for the vibr. average structure at 298.15K (Sa)

|     | 1        | 2        | 3        | 4        | 5        | 6        |
|-----|----------|----------|----------|----------|----------|----------|
| 1 C | 0.000000 |          |          |          |          |          |
| 2 O | 1.210273 | 0.000000 |          |          |          |          |
| 3 H | 1.114122 | 2.039611 | 0.000000 |          |          |          |
| 4 N | 1.372005 | 2.288983 | 2.073739 | 0.000000 |          |          |
| 5 H | 2.032601 | 2.526157 | 2.957798 | 0.990909 | 0.000000 |          |
| 6 H | 2.040412 | 3.140003 | 2.297588 | 0.969361 | 1.714047 | 0.000000 |

## Formamide, apfd/aug-cc-pvdz

### Electric dipole

-----  
Property at reference geometry, Unit: Debye  
-----

X= -3.9005 Y= 0.8047 Z= 0.0000  
-----

Temperature: 0K, Unit: Debye  
-----

X= -3.7125 Y= 0.8008 Z= 0.0000  
-----

Temperature: 298K, Unit: Debye  
-----

X= -3.6024 Y= 0.8151 Z= -0.0242  
-----

### Internal coordinates for the Equilibrium structure (Se)

|     | 1        | 2        | 3        | 4        | 5        | 6        |
|-----|----------|----------|----------|----------|----------|----------|
| 1 C | 0.000000 |          |          |          |          |          |
| 2 O | 1.215559 | 0.000000 |          |          |          |          |
| 3 H | 1.111637 | 2.041029 | 0.000000 |          |          |          |
| 4 N | 1.359266 | 2.285043 | 2.058751 | 0.000000 |          |          |
| 5 H | 2.053702 | 2.555884 | 2.972847 | 1.010155 | 0.000000 |          |
| 6 H | 2.070622 | 3.178934 | 2.314299 | 1.007501 | 1.740395 | 0.000000 |

### Internal coordinates for the vibrationally average structure at 0K (Sz)

|     | 1        | 2        | 3        | 4        | 5        | 6        |
|-----|----------|----------|----------|----------|----------|----------|
| 1 C | 0.000000 |          |          |          |          |          |
| 2 O | 1.216359 | 0.000000 |          |          |          |          |
| 3 H | 1.121913 | 2.052830 | 0.000000 |          |          |          |
| 4 N | 1.367095 | 2.286002 | 2.078751 | 0.000000 |          |          |
| 5 H | 2.045835 | 2.534766 | 2.980127 | 1.004510 | 0.000000 |          |
| 6 H | 2.062135 | 3.165485 | 2.322030 | 0.992810 | 1.734776 | 0.000000 |

### Internal coordinates for the vibr. average structure at 298.15K (Sa)

|     | 1        | 2        | 3        | 4        | 5        | 6        |
|-----|----------|----------|----------|----------|----------|----------|
| 1 C | 0.000000 |          |          |          |          |          |
| 2 O | 1.215611 | 0.000000 |          |          |          |          |
| 3 H | 1.121835 | 2.051779 | 0.000000 |          |          |          |
| 4 N | 1.370072 | 2.287482 | 2.082275 | 0.000000 |          |          |
| 5 H | 2.033794 | 2.520286 | 2.970488 | 0.996595 | 0.000000 |          |
| 6 H | 2.046202 | 3.147739 | 2.312075 | 0.975197 | 1.723056 | 0.000000 |

## Formamide, apfd/aug-cc-pvtz

### Electric dipole

-----  
Property at reference geometry, Unit: Debye  
-----

X= -3.8734 Y= 0.7906 Z= 0.0000  
-----

Temperature: 0K, Unit: Debye  
-----

X= -3.6653 Y= 0.7971 Z= 0.0000  
-----

Temperature: 298K, Unit: Debye  
-----

X= -3.5327 Y= 0.8155 Z= -0.0277  
-----

### Internal coordinates for the Equilibrium structure (Se)

|     | 1        | 2        | 3        | 4        | 5        | 6        |
|-----|----------|----------|----------|----------|----------|----------|
| 1 C | 0.000000 |          |          |          |          |          |
| 2 O | 1.208802 | 0.000000 |          |          |          |          |
| 3 H | 1.105626 | 2.029585 | 0.000000 |          |          |          |
| 4 N | 1.354909 | 2.277141 | 2.048304 | 0.000000 |          |          |
| 5 H | 2.047331 | 2.550096 | 2.959449 | 1.006053 | 0.000000 |          |
| 6 H | 2.062584 | 3.166013 | 2.301648 | 1.003244 | 1.732880 | 0.000000 |

### Internal coordinates for the vibrationally average structure at 0K (Sz)

|     | 1        | 2        | 3        | 4        | 5        | 6        |
|-----|----------|----------|----------|----------|----------|----------|
| 1 C | 0.000000 |          |          |          |          |          |
| 2 O | 1.207926 | 0.000000 |          |          |          |          |
| 3 H | 1.115642 | 2.042830 | 0.000000 |          |          |          |
| 4 N | 1.359229 | 2.265721 | 2.069996 | 0.000000 |          |          |
| 5 H | 2.032304 | 2.506572 | 2.964629 | 0.999429 | 0.000000 |          |
| 6 H | 2.051750 | 3.142819 | 2.315747 | 0.986891 | 1.725720 | 0.000000 |

### Internal coordinates for the vibr. average structure at 298.15K (Sa)

|     | 1        | 2        | 3        | 4        | 5        | 6        |
|-----|----------|----------|----------|----------|----------|----------|
| 1 C | 0.000000 |          |          |          |          |          |
| 2 O | 1.206931 | 0.000000 |          |          |          |          |
| 3 H | 1.115538 | 2.041783 | 0.000000 |          |          |          |
| 4 N | 1.362790 | 2.266881 | 2.074403 | 0.000000 |          |          |
| 5 H | 2.017512 | 2.487803 | 2.952948 | 0.989994 | 0.000000 |          |
| 6 H | 2.032886 | 3.121278 | 2.304368 | 0.965862 | 1.711870 | 0.000000 |

### Formamide, m062x/aug-cc-pvdz

#### Electric dipole

-----  
Property at reference geometry, Unit: Debye  
-----

X= -3.8638 Y= 0.8867 Z= 0.0000  
-----

Temperature: 0K, Unit: Debye  
-----

X= -3.6689 Y= 0.8798 Z= 0.0000  
-----

Temperature: 298K, Unit: Debye  
-----

X= -3.5245 Y= 0.8982 Z= -0.0286  
-----

### Internal coordinates for the Equilibrium structure (Se)

|     | 1        | 2        | 3        | 4        | 5        | 6        |
|-----|----------|----------|----------|----------|----------|----------|
| 1 C | 0.000000 |          |          |          |          |          |
| 2 O | 1.211644 | 0.000000 |          |          |          |          |
| 3 H | 1.108224 | 2.036297 | 0.000000 |          |          |          |
| 4 N | 1.359045 | 2.275202 | 2.060867 | 0.000000 |          |          |
| 5 H | 2.048941 | 2.536321 | 2.970527 | 1.009916 | 0.000000 |          |
| 6 H | 2.070018 | 3.170290 | 2.319890 | 1.006764 | 1.743171 | 0.000000 |

### Internal coordinates for the vibrationally average structure at 0K (Sz)

|     | 1        | 2        | 3        | 4        | 5        | 6        |
|-----|----------|----------|----------|----------|----------|----------|
| 1 C | 0.000000 |          |          |          |          |          |
| 2 O | 1.213248 | 0.000000 |          |          |          |          |
| 3 H | 1.118272 | 2.045814 | 0.000000 |          |          |          |
| 4 N | 1.370969 | 2.287183 | 2.080097 | 0.000000 |          |          |
| 5 H | 2.046453 | 2.534742 | 2.977798 | 1.002354 | 0.000000 |          |
| 6 H | 2.058679 | 3.160021 | 2.317218 | 0.989640 | 1.734902 | 0.000000 |

### Internal coordinates for the vibr. average structure at 298.15K (Sa)

|     | 1        | 2        | 3        | 4        | 5        | 6        |
|-----|----------|----------|----------|----------|----------|----------|
| 1 C | 0.000000 |          |          |          |          |          |
| 2 O | 1.212289 | 0.000000 |          |          |          |          |
| 3 H | 1.118254 | 2.044204 | 0.000000 |          |          |          |
| 4 N | 1.375277 | 2.290498 | 2.084422 | 0.000000 |          |          |
| 5 H | 2.032390 | 2.519896 | 2.965825 | 0.991961 | 0.000000 |          |
| 6 H | 2.037493 | 3.137740 | 2.301492 | 0.967874 | 1.720782 | 0.000000 |

### Formamide, m062x/aug-cc-pvtz

#### Electric dipole

-----  
Property at reference geometry, Unit: Debye  
-----

X= -3.8697 Y= 0.8955 Z= 0.0000  
-----

Temperature: 0K, Unit: Debye  
-----

X= -3.6646 Y= 0.8947 Z= 0.0000  
-----

Temperature: 298K, Unit: Debye  
-----

X= -3.4936 Y= 0.9171 Z= -0.0331  
-----

### Internal coordinates for the Equilibrium structure (Se)

|     | 1        | 2        | 3        | 4        | 5        | 6        |
|-----|----------|----------|----------|----------|----------|----------|
| 1 C | 0.000000 |          |          |          |          |          |
| 2 O | 1.205613 | 0.000000 |          |          |          |          |
| 3 H | 1.101420 | 2.024645 | 0.000000 |          |          |          |
| 4 N | 1.354900 | 2.268171 | 2.050158 | 0.000000 |          |          |
| 5 H | 2.043447 | 2.531956 | 2.957359 | 1.006258 | 0.000000 |          |
| 6 H | 2.063254 | 3.159158 | 2.308725 | 1.002904 | 1.735428 | 0.000000 |

### Internal coordinates for the vibrationally average structure at 0K (Sz)

|     | 1        | 2        | 3        | 4        | 5        | 6        |
|-----|----------|----------|----------|----------|----------|----------|
| 1 C | 0.000000 |          |          |          |          |          |
| 2 O | 1.207152 | 0.000000 |          |          |          |          |
| 3 H | 1.110787 | 2.033720 | 0.000000 |          |          |          |
| 4 N | 1.367395 | 2.280281 | 2.069461 | 0.000000 |          |          |
| 5 H | 2.038937 | 2.527193 | 2.962586 | 0.997789 | 0.000000 |          |
| 6 H | 2.050868 | 3.147390 | 2.305432 | 0.984099 | 1.726617 | 0.000000 |

### Internal coordinates for the vibr. average structure at 298.15K (Sa)

|     | 1        | 2        | 3        | 4        | 5        | 6        |
|-----|----------|----------|----------|----------|----------|----------|
| 1 C | 0.000000 |          |          |          |          |          |
| 2 O | 1.205986 | 0.000000 |          |          |          |          |
| 3 H | 1.110774 | 2.031951 | 0.000000 |          |          |          |
| 4 N | 1.372797 | 2.284490 | 2.074621 | 0.000000 |          |          |
| 5 H | 2.022533 | 2.509928 | 2.948456 | 0.985513 | 0.000000 |          |
| 6 H | 2.025776 | 3.121089 | 2.286233 | 0.958479 | 1.710326 | 0.000000 |

## Formamide, m062x/aug-cc-pvqz

### Electric dipole

-----  
Property at reference geometry, Unit: Debye  
-----

X= -3.8465 Y= 0.8770 Z= 0.0000  
-----

Temperature: 0K, Unit: Debye  
-----

X= -3.6426 Y= 0.8754 Z= 0.0000  
-----

Temperature: 298K, Unit: Debye  
-----

X= -3.4822 Y= 0.8965 Z= -0.0311  
-----

### Internal coordinates for the Equilibrium structure (Se)

|     | 1        | 2        | 3        | 4        | 5        | 6        |
|-----|----------|----------|----------|----------|----------|----------|
| 1 C | 0.000000 |          |          |          |          |          |
| 2 O | 1.204042 | 0.000000 |          |          |          |          |
| 3 H | 1.101075 | 2.022882 | 0.000000 |          |          |          |
| 4 N | 1.354304 | 2.266531 | 2.049149 | 0.000000 |          |          |
| 5 H | 2.042995 | 2.531560 | 2.956175 | 1.005535 | 0.000000 |          |
| 6 H | 2.062242 | 3.156839 | 2.307430 | 1.002299 | 1.733664 | 0.000000 |

### Internal coordinates for the vibrationally average structure at 0K (Sz)

|     | 1        | 2        | 3        | 4        | 5        | 6        |
|-----|----------|----------|----------|----------|----------|----------|
| 1 C | 0.000000 |          |          |          |          |          |
| 2 O | 1.205525 | 0.000000 |          |          |          |          |
| 3 H | 1.110203 | 2.032124 | 0.000000 |          |          |          |
| 4 N | 1.366728 | 2.278235 | 2.068022 | 0.000000 |          |          |
| 5 H | 2.038423 | 2.525922 | 2.961157 | 0.997419 | 0.000000 |          |
| 6 H | 2.051383 | 3.146154 | 2.305491 | 0.984319 | 1.725354 | 0.000000 |

### Internal coordinates for the vibr. average structure at 298.15K (Sa)

|     | 1        | 2        | 3        | 4        | 5        | 6        |
|-----|----------|----------|----------|----------|----------|----------|
| 1 C | 0.000000 |          |          |          |          |          |
| 2 O | 1.204430 | 0.000000 |          |          |          |          |
| 3 H | 1.110169 | 2.030505 | 0.000000 |          |          |          |
| 4 N | 1.371769 | 2.281940 | 2.072998 | 0.000000 |          |          |
| 5 H | 2.022786 | 2.508915 | 2.947901 | 0.986001 | 0.000000 |          |
| 6 H | 2.028725 | 3.122066 | 2.288806 | 0.960602 | 1.710219 | 0.000000 |

## Formamide, mp2fc/aug-cc-pvdz

### Electric dipole

-----  
Property at reference geometry, Unit: Debye  
-----

X= 3.8139 Y= 0.8287 Z= 0.0000  
-----

Temperature: 0K, Unit: Debye  
-----

X= 3.5416 Y= 0.8303 Z= 0.0000  
-----

Temperature: 298K, Unit: Debye  
-----

X= 3.1943 Y= 0.8802 Z= -0.0559  
-----

### Internal coordinates for the Equilibrium structure (Se)

|     | 1        | 2        | 3        | 4        | 5        | 6        |
|-----|----------|----------|----------|----------|----------|----------|
| 1 C | 0.000000 |          |          |          |          |          |
| 2 O | 1.228348 | 0.000000 |          |          |          |          |
| 3 H | 1.110501 | 2.054538 | 0.000000 |          |          |          |
| 4 N | 1.367904 | 2.299260 | 2.066910 | 0.000000 |          |          |
| 5 H | 2.061560 | 2.562860 | 2.980689 | 1.012459 | 0.000000 |          |
| 6 H | 2.078034 | 3.195319 | 2.321985 | 1.009862 | 1.748171 | 0.000000 |

### Internal coordinates for the vibrationally average structure at 0K (Sz)

|     | 1        | 2        | 3        | 4        | 5        | 6        |
|-----|----------|----------|----------|----------|----------|----------|
| 1 C | 0.000000 |          |          |          |          |          |
| 2 O | 1.230390 | 0.000000 |          |          |          |          |
| 3 H | 1.120318 | 2.064274 | 0.000000 |          |          |          |
| 4 N | 1.381802 | 2.311994 | 2.089180 | 0.000000 |          |          |
| 5 H | 2.050607 | 2.548487 | 2.982463 | 1.001282 | 0.000000 |          |
| 6 H | 2.061099 | 3.177921 | 2.319181 | 0.984036 | 1.735422 | 0.000000 |

### Internal coordinates for the vibr. average structure at 298.15K (Sa)

|     | 1        | 2        | 3        | 4        | 5        | 6        |
|-----|----------|----------|----------|----------|----------|----------|
| 1 C | 0.000000 |          |          |          |          |          |
| 2 O | 1.228807 | 0.000000 |          |          |          |          |
| 3 H | 1.120322 | 2.061284 | 0.000000 |          |          |          |
| 4 N | 1.391562 | 2.319043 | 2.099996 | 0.000000 |          |          |
| 5 H | 2.014797 | 2.507785 | 2.953536 | 0.978409 | 0.000000 |          |
| 6 H | 2.013416 | 3.126786 | 2.287388 | 0.932891 | 1.702705 | 0.000000 |

### Formamide, mp2fc/aug-cc-pvtz

#### Electric dipole

-----  
Property at reference geometry, Unit: Debye  
-----

X= 3.7908 Y= 0.8205 Z= 0.0000  
-----

Temperature: 0K, Unit: Debye  
-----

X= 3.4550 Y= 0.8344 Z= 0.0000  
-----

Temperature: 298K, Unit: Debye  
-----

X= 2.8170 Y= 0.9312 Z= -0.0937  
-----

### Internal coordinates for the Equilibrium structure (Se)

|     | 1        | 2        | 3        | 4        | 5        | 6        |
|-----|----------|----------|----------|----------|----------|----------|
| 1 C | 0.000000 |          |          |          |          |          |
| 2 O | 1.217687 | 0.000000 |          |          |          |          |
| 3 H | 1.099854 | 2.035445 | 0.000000 |          |          |          |
| 4 N | 1.357831 | 2.281993 | 2.048997 | 0.000000 |          |          |
| 5 H | 2.047193 | 2.545543 | 2.956738 | 1.005568 | 0.000000 |          |
| 6 H | 2.062690 | 3.171125 | 2.302251 | 1.002882 | 1.736250 | 0.000000 |



### Internal coordinates for the vibrationally average structure at 0K (Sz)

|     | 1        | 2        | 3        | 4        | 5        | 6        |
|-----|----------|----------|----------|----------|----------|----------|
| 1 C | 0.000000 |          |          |          |          |          |
| 2 O | 1.219350 | 0.000000 |          |          |          |          |
| 3 H | 1.109664 | 2.044689 | 0.000000 |          |          |          |
| 4 N | 1.373884 | 2.296192 | 2.073480 | 0.000000 |          |          |
| 5 H | 2.027598 | 2.521139 | 2.951421 | 0.988927 | 0.000000 |          |
| 6 H | 2.036710 | 3.143882 | 2.293289 | 0.967084 | 1.717358 | 0.000000 |

### Internal coordinates for the vibr. average structure at 298.15K (Sa)

|     | 1        | 2        | 3        | 4        | 5        | 6        |
|-----|----------|----------|----------|----------|----------|----------|
| 1 C | 0.000000 |          |          |          |          |          |
| 2 O | 1.216366 | 0.000000 |          |          |          |          |
| 3 H | 1.109778 | 2.039846 | 0.000000 |          |          |          |
| 4 N | 1.392822 | 2.309719 | 2.093899 | 0.000000 |          |          |
| 5 H | 1.959458 | 2.443039 | 2.896120 | 0.947841 | 0.000000 |          |
| 6 H | 1.949443 | 3.050127 | 2.234497 | 0.874409 | 1.658345 | 0.000000 |

### Formamide, mp2fc/aug-cc-pvqz

#### Electric dipole

-----  
Property at reference geometry, Unit: Debye  
-----

X= 3.7908 Y= 0.8208 Z= 0.0000  
-----

Temperature: 0K, Unit: Debye  
-----

X= 3.5586 Y= 0.8191 Z= 0.0000  
-----

Temperature: 298K, Unit: Debye  
-----

X= 3.3430 Y= 0.8504 Z= 0.0386  
-----

### Internal coordinates for the Equilibrium structure (Se)

|     | 1        | 2        | 3        | 4        | 5        | 6        |
|-----|----------|----------|----------|----------|----------|----------|
| 1 C | 0.000000 |          |          |          |          |          |
| 2 O | 1.214617 | 0.000000 |          |          |          |          |
| 3 H | 1.099183 | 2.032115 | 0.000000 |          |          |          |
| 4 N | 1.355195 | 2.276403 | 2.046809 | 0.000000 |          |          |
| 5 H | 2.043303 | 2.538875 | 2.953115 | 1.004287 | 0.000000 |          |
| 6 H | 2.059468 | 3.164692 | 2.300067 | 1.001557 | 1.734157 | 0.000000 |

### Internal coordinates for the vibrationally average structure at 0K (Sz)

|     | 1        | 2        | 3        | 4        | 5        | 6        |
|-----|----------|----------|----------|----------|----------|----------|
| 1 C | 0.000000 |          |          |          |          |          |
| 2 O | 1.216695 | 0.000000 |          |          |          |          |
| 3 H | 1.108925 | 2.042134 | 0.000000 |          |          |          |
| 4 N | 1.368102 | 2.288282 | 2.067776 | 0.000000 |          |          |
| 5 H | 2.034755 | 2.527067 | 2.956634 | 0.994970 | 0.000000 |          |
| 6 H | 2.047090 | 3.152082 | 2.299965 | 0.980774 | 1.724809 | 0.000000 |

### Internal coordinates for the vibr. average structure at 298.15K (Sa)

|     | 1        | 2        | 3        | 4        | 5        | 6        |
|-----|----------|----------|----------|----------|----------|----------|
| 1 C | 0.000000 |          |          |          |          |          |
| 2 O | 1.215592 | 0.000000 |          |          |          |          |
| 3 H | 1.108858 | 2.040282 | 0.000000 |          |          |          |
| 4 N | 1.374485 | 2.292809 | 2.074553 | 0.000000 |          |          |
| 5 H | 2.011833 | 2.501072 | 2.937820 | 0.979792 | 0.000000 |          |
| 6 H | 2.017247 | 3.119990 | 2.279647 | 0.948595 | 1.704151 | 0.000000 |

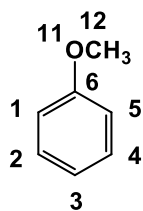

## Anisole, b3lyp/aug-cc-pvtz

### Electric dipole

Property at reference geometry, Unit: Debye

X= 0.7964 Y= 1.0370 Z= 0.0000 **Total 1.308**

Temperature: 0K, Unit: Debye

X= 0.7901 Y= 1.0037 Z= 0.0000 **Total 1.277**

Temperature: 298K, Unit: Debye

X= 0.7680 Y= 0.9942 Z= 0.0004 **Total 1.256**

### Internal coordinates for the Equilibrium structure (Se)

|      |          |          |          |          |          |          |
|------|----------|----------|----------|----------|----------|----------|
|      | 1        | 2        | 3        | 4        | 5        |          |
| 1 C  | 0.000000 |          |          |          |          |          |
| 2 C  | 1.393863 | 0.000000 |          |          |          |          |
| 3 C  | 2.419400 | 1.386532 | 0.000000 |          |          |          |
| 4 C  | 2.782622 | 2.397698 | 1.394080 | 0.000000 |          |          |
| 5 C  | 2.414819 | 2.774216 | 2.413454 | 1.384370 | 0.000000 |          |
| 6 C  | 1.394080 | 2.408193 | 2.793410 | 2.409524 | 1.397475 |          |
| 7 H  | 1.079122 | 2.141892 | 3.389664 | 3.861620 | 3.400341 |          |
| 8 H  | 2.139223 | 1.081987 | 2.143597 | 3.381994 | 3.856175 |          |
| 9 H  | 3.864490 | 3.380667 | 2.150260 | 1.081890 | 2.134482 |          |
| 10 H | 3.385586 | 3.855145 | 3.400531 | 2.154380 | 1.081079 |          |
| 11 O | 2.439991 | 3.687461 | 4.154498 | 3.618055 | 2.339156 |          |
| 12 C | 2.832643 | 4.225215 | 5.044209 | 4.800298 | 3.646194 |          |
| 13 H | 3.893970 | 5.280110 | 6.014090 | 5.615701 | 4.348416 |          |
| 14 H | 2.824470 | 4.157315 | 5.103283 | 5.036147 | 4.019274 |          |
| 15 H | 2.824470 | 4.157314 | 5.103282 | 5.036146 | 4.019273 |          |
| 16 H | 3.399053 | 2.146940 | 1.080919 | 2.153490 | 3.392873 |          |
|      | 6        | 7        | 8        | 9        | 10       |          |
| 6 C  | 0.000000 |          |          |          |          |          |
| 7 H  | 2.158486 | 0.000000 |          |          |          |          |
| 8 H  | 3.383706 | 2.449598 | 0.000000 |          |          |          |
| 9 H  | 3.386586 | 4.943507 | 4.280275 | 0.000000 |          |          |
| 10 H | 2.137790 | 4.284429 | 4.937049 | 2.477069 | 0.000000 |          |
| 11 O | 1.363840 | 2.728885 | 4.571179 | 4.472895 | 2.524656 |          |
| 12 C | 2.392432 | 2.542383 | 4.871957 | 5.746535 | 3.941254 |          |
| 13 H | 3.262736 | 3.621948 | 5.955719 | 6.482698 | 4.404164 |          |
| 14 H | 2.720415 | 2.341371 | 4.671938 | 6.022461 | 4.441127 |          |
| 15 H | 2.720414 | 2.341371 | 4.671938 | 6.022460 | 4.441127 |          |
| 16 H | 3.874329 | 4.280124 | 2.475705 | 2.482741 | 4.296390 |          |
|      | 11       | 12       | 13       | 14       | 15       | 16       |
| 11 O | 0.000000 |          |          |          |          |          |
| 12 C | 1.418333 | 0.000000 |          |          |          |          |
| 13 H | 2.010248 | 1.086586 | 0.000000 |          |          |          |
| 14 H | 2.083332 | 1.093058 | 1.777654 | 0.000000 |          |          |
| 15 H | 2.083332 | 1.093058 | 1.777654 | 1.783099 | 0.000000 |          |
| 16 H | 5.235147 | 6.104263 | 7.087535 | 6.119162 | 6.119162 | 0.000000 |

### Internal coordinates for the vibrationally average structure at 0K (Sz)

|      | 1        | 2        | 3        | 4        | 5        |          | 6 | 7 | 8 | 9 | 10 |  | 11 | 12 | 13 | 14 | 15 | 16 |
|------|----------|----------|----------|----------|----------|----------|---|---|---|---|----|--|----|----|----|----|----|----|
| 1 C  | 0.000000 |          |          |          |          |          |   |   |   |   |    |  |    |    |    |    |    |    |
| 2 C  | 1.398248 | 0.000000 |          |          |          |          |   |   |   |   |    |  |    |    |    |    |    |    |
| 3 C  | 2.427196 | 1.391229 | 0.000000 |          |          |          |   |   |   |   |    |  |    |    |    |    |    |    |
| 4 C  | 2.792604 | 2.406445 | 1.398963 | 0.000000 |          |          |   |   |   |   |    |  |    |    |    |    |    |    |
| 5 C  | 2.424130 | 2.784267 | 2.421410 | 1.388776 | 0.000000 |          |   |   |   |   |    |  |    |    |    |    |    |    |
| 6 C  | 1.398919 | 2.415415 | 2.801124 | 2.416546 | 1.402003 |          |   |   |   |   |    |  |    |    |    |    |    |    |
| 7 H  | 1.082496 | 2.148846 | 3.400700 | 3.874983 | 3.412621 |          |   |   |   |   |    |  |    |    |    |    |    |    |
| 8 H  | 2.146935 | 1.086311 | 2.151279 | 3.394489 | 3.870555 |          |   |   |   |   |    |  |    |    |    |    |    |    |
| 9 H  | 3.878537 | 3.393031 | 2.158125 | 1.085952 | 2.141779 |          |   |   |   |   |    |  |    |    |    |    |    |    |
| 10 H | 3.397732 | 3.868918 | 3.412544 | 2.162400 | 1.084827 |          |   |   |   |   |    |  |    |    |    |    |    |    |
| 11 O | 2.450044 | 3.700384 | 4.167061 | 3.627937 | 2.344528 |          |   |   |   |   |    |  |    |    |    |    |    |    |
| 12 C | 2.859185 | 4.255795 | 5.072391 | 4.821871 | 3.659949 |          |   |   |   |   |    |  |    |    |    |    |    |    |
| 13 H | 3.917729 | 5.307189 | 6.036758 | 5.630248 | 4.355616 |          |   |   |   |   |    |  |    |    |    |    |    |    |
| 14 H | 2.857366 | 4.196929 | 5.141510 | 5.067180 | 4.040589 |          |   |   |   |   |    |  |    |    |    |    |    |    |
| 15 H | 2.857368 | 4.196930 | 5.141510 | 5.067180 | 4.040589 |          |   |   |   |   |    |  |    |    |    |    |    |    |
| 16 H | 3.409809 | 2.153709 | 1.084468 | 2.160833 | 3.404039 |          |   |   |   |   |    |  |    |    |    |    |    |    |
| 6 C  | 0.000000 |          |          |          |          |          |   |   |   |   |    |  |    |    |    |    |    |    |
| 7 H  | 2.166077 | 0.000000 |          |          |          |          |   |   |   |   |    |  |    |    |    |    |    |    |
| 8 H  | 3.395248 | 2.458446 | 0.000000 |          |          |          |   |   |   |   |    |  |    |    |    |    |    |    |
| 9 H  | 3.397508 | 4.960933 | 4.295934 | 0.000000 |          |          |   |   |   |   |    |  |    |    |    |    |    |    |
| 10 H | 2.144609 | 4.299055 | 4.955150 | 2.486826 | 0.000000 |          |   |   |   |   |    |  |    |    |    |    |    |    |
| 11 O | 1.368902 | 2.741197 | 4.588653 | 4.485607 | 2.528447 |          |   |   |   |   |    |  |    |    |    |    |    |    |
| 12 C | 2.407704 | 2.573309 | 4.908744 | 5.769404 | 3.948189 |          |   |   |   |   |    |  |    |    |    |    |    |    |
| 13 H | 3.274476 | 3.652535 | 5.990426 | 6.497326 | 4.402998 |          |   |   |   |   |    |  |    |    |    |    |    |    |
| 14 H | 2.740379 | 2.376989 | 4.717837 | 6.055262 | 4.455128 |          |   |   |   |   |    |  |    |    |    |    |    |    |
| 15 H | 2.740380 | 2.376992 | 4.717839 | 6.055262 | 4.455128 |          |   |   |   |   |    |  |    |    |    |    |    |    |
| 16 H | 3.885592 | 4.293810 | 2.483535 | 2.491614 | 4.311588 |          |   |   |   |   |    |  |    |    |    |    |    |    |
| 11 O | 0.000000 |          |          |          |          |          |   |   |   |   |    |  |    |    |    |    |    |    |
| 12 C | 1.420733 | 0.000000 |          |          |          |          |   |   |   |   |    |  |    |    |    |    |    |    |
| 13 H | 2.012740 | 1.085302 | 0.000000 |          |          |          |   |   |   |   |    |  |    |    |    |    |    |    |
| 14 H | 2.086828 | 1.090674 | 1.772651 | 0.000000 |          |          |   |   |   |   |    |  |    |    |    |    |    |    |
| 15 H | 2.086828 | 1.090674 | 1.772651 | 1.776042 | 0.000000 |          |   |   |   |   |    |  |    |    |    |    |    |    |
| 16 H | 5.251243 | 6.136649 | 7.114286 | 6.162302 | 6.162302 | 0.000000 |   |   |   |   |    |  |    |    |    |    |    |    |

### Internal coordinates for the vibr. average structure at 298.15K (Sa)

|      | 1        | 2        | 3        | 4        | 5        |
|------|----------|----------|----------|----------|----------|
| 1 C  | 0.000000 |          |          |          |          |
| 2 C  | 1.396488 | 0.000000 |          |          |          |
| 3 C  | 2.423276 | 1.389559 | 0.000000 |          |          |
| 4 C  | 2.789205 | 2.405012 | 1.398165 | 0.000000 |          |
| 5 C  | 2.422385 | 2.783428 | 2.419777 | 1.387555 | 0.000000 |
| 6 C  | 1.398871 | 2.414814 | 2.798514 | 2.414013 | 1.400636 |
| 7 H  | 1.080872 | 2.145351 | 3.395227 | 3.869961 | 3.409249 |
| 8 H  | 2.145376 | 1.085667 | 2.149529 | 3.392531 | 3.869073 |
| 9 H  | 3.873360 | 3.390010 | 2.156440 | 1.084175 | 2.138604 |
| 10 H | 3.395493 | 3.867321 | 3.410441 | 2.161020 | 1.084069 |
| 11 O | 2.450000 | 3.699230 | 4.164129 | 3.625358 | 2.343223 |
| 12 C | 2.869331 | 4.263768 | 5.072691 | 4.815698 | 3.650748 |
| 13 H | 3.914305 | 5.300926 | 6.021669 | 5.608544 | 4.332160 |
| 14 H | 2.865764 | 4.207498 | 5.144113 | 5.060739 | 4.027685 |
| 15 H | 2.865767 | 4.207500 | 5.144115 | 5.060740 | 4.027686 |
| 16 H | 3.403710 | 2.149613 | 1.082414 | 2.158700 | 3.400624 |

|      |          |          |          |          |          |          |
|------|----------|----------|----------|----------|----------|----------|
|      | 6        | 7        | 8        | 9        | 10       |          |
| 6 C  | 0.000000 |          |          |          |          |          |
| 7 H  | 2.164426 | 0.000000 |          |          |          |          |
| 8 H  | 3.394277 | 2.455534 | 0.000000 |          |          |          |
| 9 H  | 3.393031 | 4.954134 | 4.292564 | 0.000000 |          |          |
| 10 H | 2.142650 | 4.295326 | 4.952910 | 2.483948 | 0.000000 |          |
| 11 O | 1.368528 | 2.740316 | 4.587174 | 4.481123 | 2.526691 |          |
| 12 C | 2.404862 | 2.591408 | 4.920698 | 5.758894 | 3.932437 |          |
| 13 H | 3.258922 | 3.658898 | 5.989096 | 6.470753 | 4.373371 |          |
| 14 H | 2.730770 | 2.394306 | 4.734897 | 6.044875 | 4.434387 |          |
| 15 H | 2.730772 | 2.394311 | 4.734900 | 6.044876 | 4.434387 |          |
| 16 H | 3.880928 | 4.286150 | 2.479576 | 2.490113 | 4.307989 |          |
|      | 11       | 12       | 13       | 14       | 15       | 16       |
| 11 O | 0.000000 |          |          |          |          |          |
| 12 C | 1.406224 | 0.000000 |          |          |          |          |
| 13 H | 1.991475 | 1.072788 | 0.000000 |          |          |          |
| 14 H | 2.059722 | 1.069364 | 1.746181 | 0.000000 |          |          |
| 15 H | 2.059722 | 1.069364 | 1.746181 | 1.735293 | 0.000000 |          |
| 16 H | 5.246268 | 6.135707 | 7.097678 | 6.165255 | 6.165257 | 0.000000 |

### Benzaldehyde, b3lyp/aug-cc-pvtz

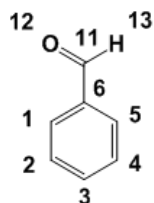

### Electric dipole

Property at reference geometry, Unit: Debye

X= -3.2913 Y= -1.1911 Z= -0.0000 **Total: 3.5002**

Temperature: 0K, Unit: Debye

X= -3.2289 Y= -1.1434 Z= -0.0000 **Total: 3.425**

Temperature: 298K, Unit: Debye

X= -3.1978 Y= -1.1314 Z= -0.0012 **Total: 3.390**

### Internal coordinates for the Equilibrium structure (Se)

|      |          |          |          |          |          |  |
|------|----------|----------|----------|----------|----------|--|
|      | 1        | 2        | 3        | 4        | 5        |  |
| 1 C  | 0.000000 |          |          |          |          |  |
| 2 C  | 1.384793 | 0.000000 |          |          |          |  |
| 3 C  | 2.407823 | 1.394761 | 0.000000 |          |          |  |
| 4 C  | 2.790414 | 2.415972 | 1.390309 | 0.000000 |          |  |
| 5 C  | 2.416819 | 2.781758 | 2.402594 | 1.388891 | 0.000000 |  |
| 6 C  | 1.398135 | 2.408701 | 2.779954 | 2.414396 | 1.395244 |  |
| 7 H  | 1.081191 | 2.155007 | 3.396948 | 3.871400 | 3.388495 |  |
| 8 H  | 2.141982 | 1.081525 | 2.148951 | 3.393636 | 3.863266 |  |
| 9 H  | 3.871741 | 3.395948 | 2.147585 | 1.081333 | 2.146991 |  |
| 10 H | 3.395587 | 3.864963 | 3.387422 | 2.149252 | 1.083242 |  |
| 11 C | 2.501152 | 3.767595 | 4.257511 | 3.760141 | 2.480313 |  |
| 12 O | 2.896845 | 4.277901 | 5.058386 | 4.794457 | 3.609191 |  |
| 13 H | 3.453076 | 4.592232 | 4.814982 | 4.016301 | 2.629208 |  |
| 14 H | 3.385936 | 2.148527 | 1.081809 | 2.144884 | 3.383051 |  |

|      | 6        | 7        | 8        | 9        | 10       |
|------|----------|----------|----------|----------|----------|
| 6 C  | 0.000000 |          |          |          |          |
| 7 H  | 2.139885 | 0.000000 |          |          |          |
| 8 H  | 3.390648 | 2.489021 | 0.000000 |          |          |
| 9 H  | 3.395188 | 4.952730 | 4.286117 | 0.000000 |          |
| 10 H | 2.146327 | 4.276198 | 4.946482 | 2.479015 | 0.000000 |
| 11 C | 1.477661 | 2.695065 | 4.640705 | 4.626074 | 2.674802 |
| 12 O | 2.387450 | 2.606337 | 4.957976 | 5.731565 | 3.883783 |
| 13 H | 2.184067 | 3.782997 | 5.550913 | 4.687794 | 2.351533 |
| 14 H | 3.861761 | 4.291224 | 2.471447 | 2.471775 | 4.282031 |

  

|      | 11       | 12       | 13       | 14       |
|------|----------|----------|----------|----------|
| 11 C | 0.000000 |          |          |          |
| 12 O | 1.209342 | 0.000000 |          |          |
| 13 H | 1.108751 | 2.012693 | 0.000000 |          |
| 14 H | 5.339316 | 6.123655 | 5.876451 | 0.000000 |

### Internal coordinates for the vibrationally average structure at 0K (Sz)

|      | 1        | 2        | 3        | 4        | 5        |
|------|----------|----------|----------|----------|----------|
| 1 C  | 0.000000 |          |          |          |          |
| 2 C  | 1.389240 | 0.000000 |          |          |          |
| 3 C  | 2.415308 | 1.399197 | 0.000000 |          |          |
| 4 C  | 2.799652 | 2.424371 | 1.395268 | 0.000000 |          |
| 5 C  | 2.425465 | 2.791624 | 2.410620 | 1.393123 | 0.000000 |
| 6 C  | 1.403061 | 2.416659 | 2.788445 | 2.421676 | 1.399837 |
| 7 H  | 1.085444 | 2.162458 | 3.408325 | 3.884889 | 3.401002 |
| 8 H  | 2.149514 | 1.085885 | 2.156812 | 3.406136 | 3.877491 |
| 9 H  | 3.885026 | 3.408115 | 2.155723 | 1.085379 | 2.153766 |
| 10 H | 3.408457 | 3.879350 | 3.399619 | 2.156814 | 1.087762 |
| 11 C | 2.509528 | 3.780538 | 4.272457 | 3.774186 | 2.490956 |
| 12 O | 2.904847 | 4.290252 | 5.072222 | 4.806980 | 3.618108 |
| 13 H | 3.463904 | 4.607515 | 4.831703 | 4.031227 | 2.640006 |
| 14 H | 3.396797 | 2.155447 | 1.085609 | 2.152477 | 3.394441 |

  

|      | 6        | 7        | 8        | 9        | 10       |
|------|----------|----------|----------|----------|----------|
| 6 C  | 0.000000 |          |          |          |          |
| 7 H  | 2.148052 | 0.000000 |          |          |          |
| 8 H  | 3.402612 | 2.497549 | 0.000000 |          |          |
| 9 H  | 3.406044 | 4.970265 | 4.302114 | 0.000000 |          |
| 10 H | 2.154509 | 4.292590 | 4.965228 | 2.486959 | 0.000000 |
| 11 C | 1.484089 | 2.703413 | 4.656707 | 4.643458 | 2.687264 |
| 12 O | 2.392819 | 2.614760 | 4.973575 | 5.747290 | 3.894143 |
| 13 H | 2.191476 | 3.794297 | 5.569618 | 4.705604 | 2.363010 |
| 14 H | 3.874052 | 4.305590 | 2.480028 | 2.481140 | 4.297212 |

  

|      | 11       | 12       | 13       | 14       |
|------|----------|----------|----------|----------|
| 11 C | 0.000000 |          |          |          |
| 12 O | 1.207216 | 0.000000 |          |          |
| 13 H | 1.111722 | 2.012632 | 0.000000 |          |
| 14 H | 5.358064 | 6.141304 | 5.897057 | 0.000000 |

### Internal coordinates for the vibr. average structure at 298.15K (Sa)

|     | 1        | 2        | 3        | 4        | 5        |
|-----|----------|----------|----------|----------|----------|
| 1 C | 0.000000 |          |          |          |          |
| 2 C | 1.387781 | 0.000000 |          |          |          |
| 3 C | 2.411738 | 1.397322 | 0.000000 |          |          |
| 4 C | 2.796687 | 2.422892 | 1.394707 | 0.000000 |          |
| 5 C | 2.424522 | 2.790782 | 2.408739 | 1.391144 | 0.000000 |
| 6 C | 1.402925 | 2.415866 | 2.785814 | 2.419184 | 1.399405 |
| 7 H | 1.084304 | 2.159235 | 3.403286 | 3.880798 | 3.399420 |
| 8 H | 2.147578 | 1.085159 | 2.155143 | 3.404322 | 3.875924 |
| 9 H | 3.880494 | 3.405324 | 2.154571 | 1.083812 | 2.149761 |

|    |   |          |          |          |          |          |
|----|---|----------|----------|----------|----------|----------|
| 10 | H | 3.407387 | 3.877821 | 3.397014 | 2.154257 | 1.087070 |
| 11 | C | 2.509085 | 3.779139 | 4.269612 | 3.771915 | 2.490985 |
| 12 | O | 2.903961 | 4.287642 | 5.065181 | 4.797757 | 3.609715 |
| 13 | H | 3.454889 | 4.599588 | 4.825712 | 4.028797 | 2.639889 |
| 14 | H | 3.390915 | 2.151174 | 1.083316 | 2.150210 | 3.390325 |

|    | 6 | 7        | 8        | 9        | 10       |          |
|----|---|----------|----------|----------|----------|----------|
| 6  | C | 0.000000 |          |          |          |          |
| 7  | H | 2.147468 | 0.000000 |          |          |          |
| 8  | H | 3.401081 | 2.493616 | 0.000000 |          |          |
| 9  | H | 3.401767 | 4.964606 | 4.299292 | 0.000000 |          |
| 10 | H | 2.154110 | 4.291357 | 4.962973 | 2.482103 | 0.000000 |
| 11 | C | 1.483863 | 2.703271 | 4.654406 | 4.639465 | 2.688331 |
| 12 | O | 2.386547 | 2.619120 | 4.972130 | 5.735433 | 3.884852 |
| 13 | H | 2.184553 | 3.783569 | 5.559863 | 4.703761 | 2.369232 |
| 14 | H | 3.869128 | 4.298106 | 2.476541 | 2.479863 | 4.292439 |

|    | 11 | 12       | 13       | 14       |          |
|----|----|----------|----------|----------|----------|
| 11 | C  | 0.000000 |          |          |          |
| 12 | O  | 1.196770 | 0.000000 |          |          |
| 13 | H  | 1.100492 | 1.989304 | 0.000000 |          |
| 14 | H  | 5.352927 | 6.132269 | 5.889322 | 0.000000 |

### Nitrobenzene, b3lyp/aug-cc-pvtz

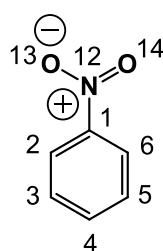

### Electric dipole

Property at reference geometry, Unit: Debye

X= 0.0000 Y= -0.0000 Z= -4.7066

Temperature: OK, Unit: Debye

X= -0.0000 Y= 0.0000 Z= -4.6664

Temperature: 298K, Unit: Debye

X= 0.0003 Y= -0.0000 Z= -4.6435

### Internal coordinates for the Equilibrium structure (Se)

|    | 1 | 2        | 3        | 4        | 5        |          |
|----|---|----------|----------|----------|----------|----------|
| 1  | C | 0.000000 |          |          |          |          |
| 2  | C | 1.387820 | 0.000000 |          |          |          |
| 3  | C | 2.386192 | 1.387820 | 0.000000 |          |          |
| 4  | C | 2.750974 | 2.409169 | 1.391537 | 0.000000 |          |
| 5  | C | 2.386192 | 2.791419 | 2.413929 | 1.391537 | 0.000000 |
| 6  | C | 1.387820 | 2.430054 | 2.791419 | 2.409169 | 1.387820 |
| 7  | H | 2.137572 | 1.078512 | 2.160327 | 3.397857 | 3.869605 |
| 8  | H | 3.368361 | 2.139699 | 1.080908 | 2.148699 | 3.393497 |
| 9  | H | 3.832398 | 3.387185 | 2.145626 | 1.081423 | 2.145626 |
| 10 | H | 3.368361 | 3.872324 | 3.393497 | 2.148699 | 1.080908 |
| 11 | H | 2.137572 | 3.396891 | 3.869605 | 3.397857 | 2.160327 |
| 12 | N | 1.476821 | 2.467360 | 3.735610 | 4.227795 | 3.735610 |
| 13 | O | 2.313451 | 2.718497 | 4.104947 | 4.916231 | 4.698534 |
| 14 | O | 2.313451 | 3.556791 | 4.698534 | 4.916231 | 4.104947 |

|      | 6        | 7        | 8        | 9        | 10       |
|------|----------|----------|----------|----------|----------|
| 6 C  | 0.000000 |          |          |          |          |
| 7 H  | 3.396891 | 0.000000 |          |          |          |
| 8 H  | 3.872324 | 2.490980 | 0.000000 |          |          |
| 9 H  | 3.387185 | 4.293282 | 2.473088 | 0.000000 |          |
| 10 H | 2.139699 | 4.950501 | 4.286564 | 2.473088 | 0.000000 |
| 11 H | 1.078512 | 4.269732 | 4.950501 | 4.293282 | 2.490980 |
| 12 N | 2.467360 | 2.658539 | 4.604551 | 5.309219 | 4.604551 |
| 13 O | 3.556791 | 2.395721 | 4.762780 | 5.975863 | 5.653632 |
| 14 O | 2.718497 | 3.870726 | 5.653632 | 5.975863 | 4.762780 |

  

|      | 11       | 12       | 13       | 14       |
|------|----------|----------|----------|----------|
| 11 H | 0.000000 |          |          |          |
| 12 N | 2.658539 | 0.000000 |          |          |
| 13 O | 3.870726 | 1.222281 | 0.000000 |          |
| 14 O | 2.395721 | 1.222281 | 2.164783 | 0.000000 |

### Internal coordinates for the vibrationally average structure at 0K (Sz)

|      | 1        | 2        | 3        | 4        | 5        |
|------|----------|----------|----------|----------|----------|
| 1 C  | 0.000000 |          |          |          |          |
| 2 C  | 1.391879 | 0.000000 |          |          |          |
| 3 C  | 2.392916 | 1.392302 | 0.000000 |          |          |
| 4 C  | 2.758536 | 2.416763 | 1.395768 | 0.000000 |          |
| 5 C  | 2.392916 | 2.800388 | 2.421428 | 1.395768 | 0.000000 |
| 6 C  | 1.391879 | 2.438094 | 2.800388 | 2.416763 | 1.392302 |
| 7 H  | 2.144486 | 1.082261 | 2.167874 | 3.409079 | 3.882312 |
| 8 H  | 3.378588 | 2.146755 | 1.084626 | 2.155594 | 3.404335 |
| 9 H  | 3.843723 | 3.398157 | 2.152472 | 1.085186 | 2.152472 |
| 10 H | 3.378588 | 3.885011 | 3.404335 | 2.155594 | 1.084626 |
| 11 H | 2.144486 | 3.408130 | 3.882312 | 3.409079 | 2.167874 |
| 12 N | 1.485308 | 2.477698 | 3.750150 | 4.243844 | 3.750150 |
| 13 O | 2.321907 | 2.729165 | 4.120024 | 4.932836 | 4.713610 |
| 14 O | 2.321907 | 3.567626 | 4.713610 | 4.932836 | 4.120024 |

  

|      | 6        | 7        | 8        | 9        | 10       |
|------|----------|----------|----------|----------|----------|
| 6 C  | 0.000000 |          |          |          |          |
| 7 H  | 3.408130 | 0.000000 |          |          |          |
| 8 H  | 3.885011 | 2.499758 | 0.000000 |          |          |
| 9 H  | 3.398157 | 4.307641 | 2.480959 | 0.000000 |          |
| 10 H | 2.146755 | 4.966927 | 4.300388 | 2.480959 | 0.000000 |
| 11 H | 1.082261 | 4.283699 | 4.966927 | 4.307641 | 2.499758 |
| 12 N | 2.477698 | 2.668477 | 4.621967 | 5.329030 | 4.621967 |
| 13 O | 3.567626 | 2.405970 | 4.780757 | 5.996292 | 5.671683 |
| 14 O | 2.729165 | 3.881354 | 5.671683 | 5.996292 | 4.780757 |

  

|      | 11       | 12       | 13       | 14       |
|------|----------|----------|----------|----------|
| 11 H | 0.000000 |          |          |          |
| 12 N | 2.668477 | 0.000000 |          |          |
| 13 O | 3.881354 | 1.223001 | 0.000000 |          |
| 14 O | 2.405970 | 1.223001 | 2.165469 | 0.000000 |

### Internal coordinates for the vibr. average structure at 298.15K (Sa)

|     | 1        | 2        | 3        | 4        | 5        |
|-----|----------|----------|----------|----------|----------|
| 1 C | 0.000000 |          |          |          |          |
| 2 C | 1.388331 | 0.000000 |          |          |          |
| 3 C | 2.389454 | 1.391225 | 0.000000 |          |          |
| 4 C | 2.756479 | 2.412966 | 1.390983 | 0.000000 |          |
| 5 C | 2.389454 | 2.792034 | 2.411488 | 1.390983 | 0.000000 |
| 6 C | 1.388331 | 2.430011 | 2.792034 | 2.412966 | 1.391225 |
| 7 H | 2.138204 | 1.079659 | 2.165207 | 3.402561 | 3.871381 |
| 8 H | 3.371086 | 2.142676 | 1.080346 | 2.146196 | 3.389996 |
| 9 H | 3.839658 | 3.392931 | 2.147228 | 1.083178 | 2.147228 |

|    |   |          |          |          |          |          |
|----|---|----------|----------|----------|----------|----------|
| 10 | H | 3.371086 | 3.872376 | 3.389996 | 2.146196 | 1.080346 |
| 11 | H | 2.138204 | 3.397681 | 3.871381 | 3.402561 | 2.165207 |
| 12 | N | 1.484821 | 2.475271 | 3.747044 | 4.241300 | 3.747044 |
| 13 | O | 2.310008 | 2.727439 | 4.116848 | 4.923785 | 4.697921 |
| 14 | O | 2.310008 | 3.549688 | 4.697921 | 4.923785 | 4.116848 |

|    |   |          |          |          |          |          |
|----|---|----------|----------|----------|----------|----------|
|    |   | 6        | 7        | 8        | 9        | 10       |
| 6  | C | 0.000000 |          |          |          |          |
| 7  | H | 3.397681 | 0.000000 |          |          |          |
| 8  | H | 3.872376 | 2.496592 | 0.000000 |          |          |
| 9  | H | 3.392931 | 4.299921 | 2.471752 | 0.000000 |          |
| 10 | H | 2.142676 | 4.951716 | 4.281557 | 2.471752 | 0.000000 |
| 11 | H | 1.079659 | 4.270999 | 4.951716 | 4.299921 | 2.496592 |
| 12 | N | 2.475271 | 2.663805 | 4.615423 | 5.324478 | 4.615423 |
| 13 | O | 3.549688 | 2.411080 | 4.778854 | 5.986028 | 5.650797 |
| 14 | O | 2.727439 | 3.858101 | 5.650797 | 5.986028 | 4.778854 |

|    |   |          |          |          |          |
|----|---|----------|----------|----------|----------|
|    |   | 11       | 12       | 13       | 14       |
| 11 | H | 0.000000 |          |          |          |
| 12 | N | 2.663805 | 0.000000 |          |          |
| 13 | O | 3.858101 | 1.203693 | 0.000000 |          |
| 14 | O | 2.411080 | 1.203693 | 2.124008 | 0.000000 |

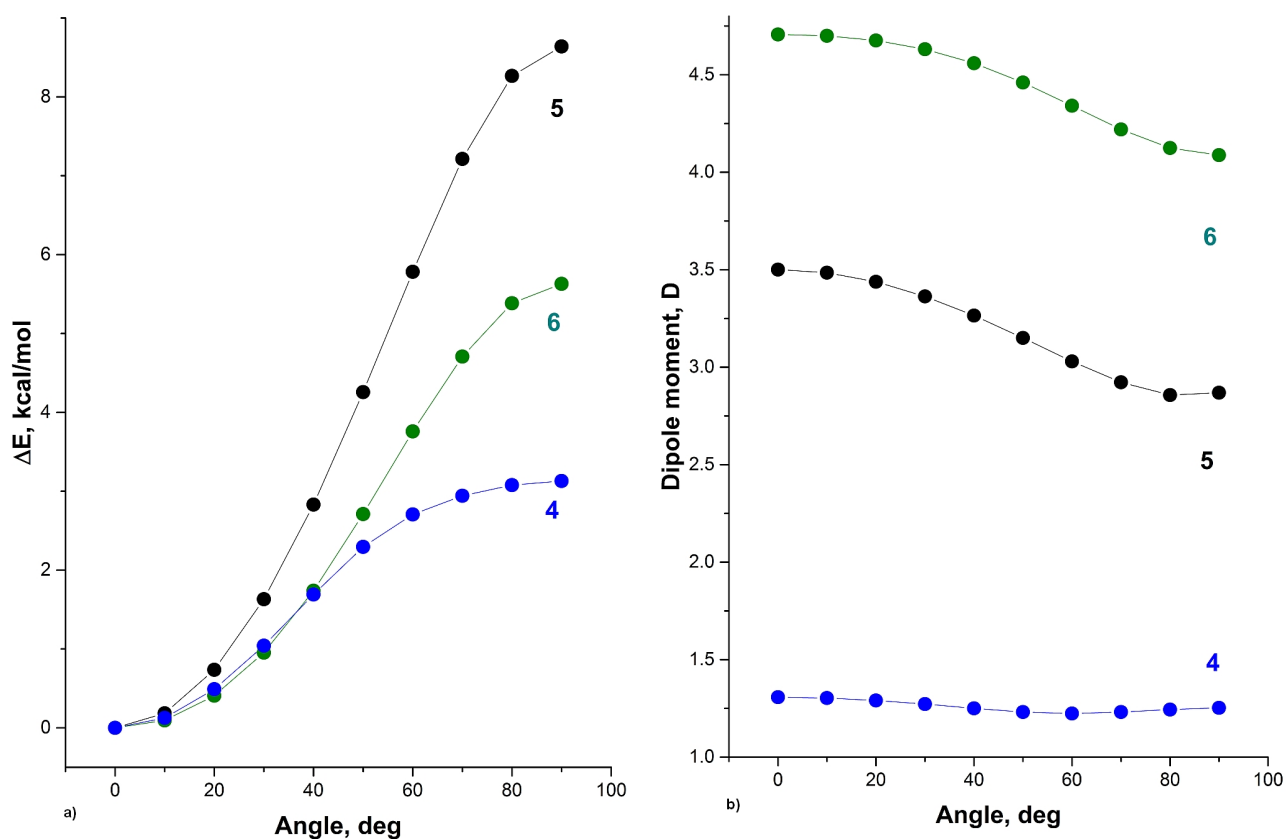

Fig. 15. Anisole (4, blue), benzaldehyde (5, black) and nitrobenzene (6, green). a) PES in the gas phase; b) Dipole moments of the rotamers corresponding to PES.



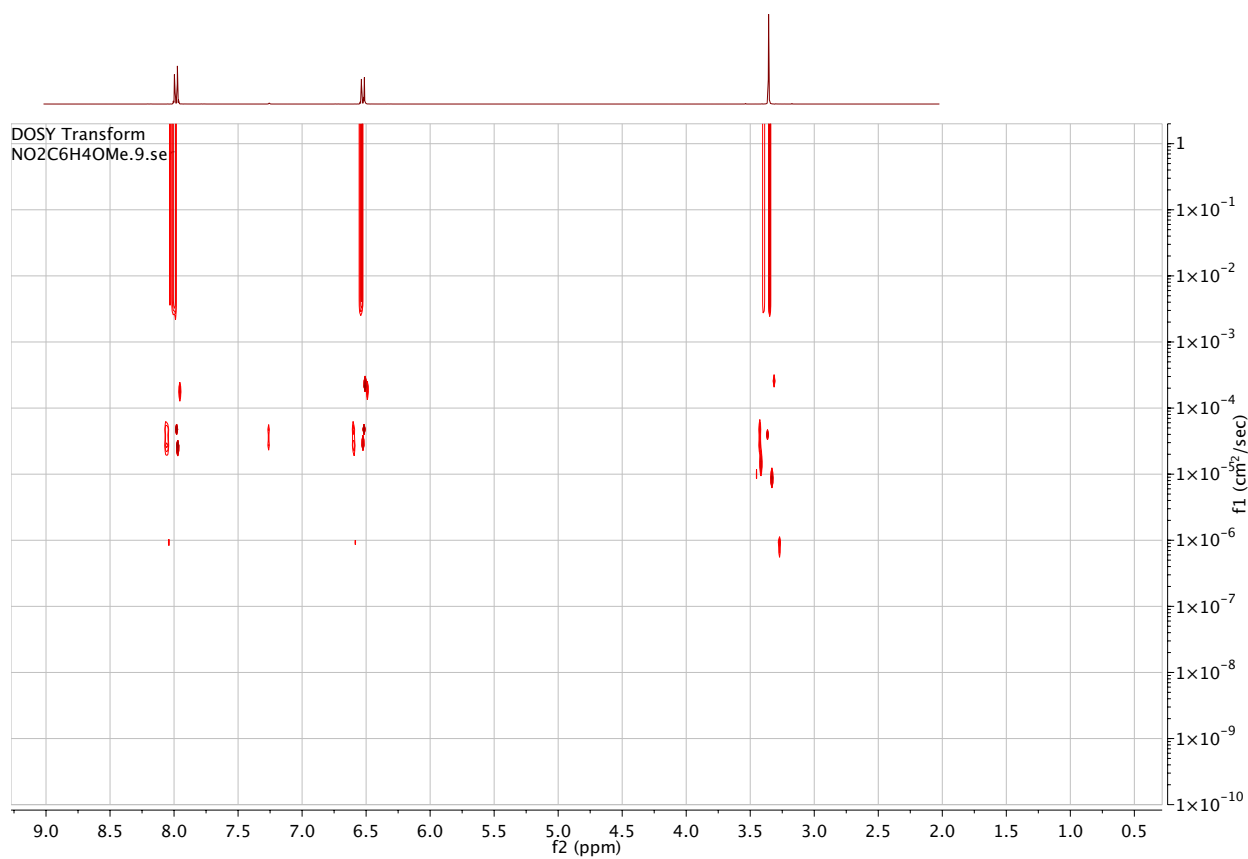

Fig. 2S. DOSY H-NMR spectrum of *p*-nitroanisole (**10**) in benzene.

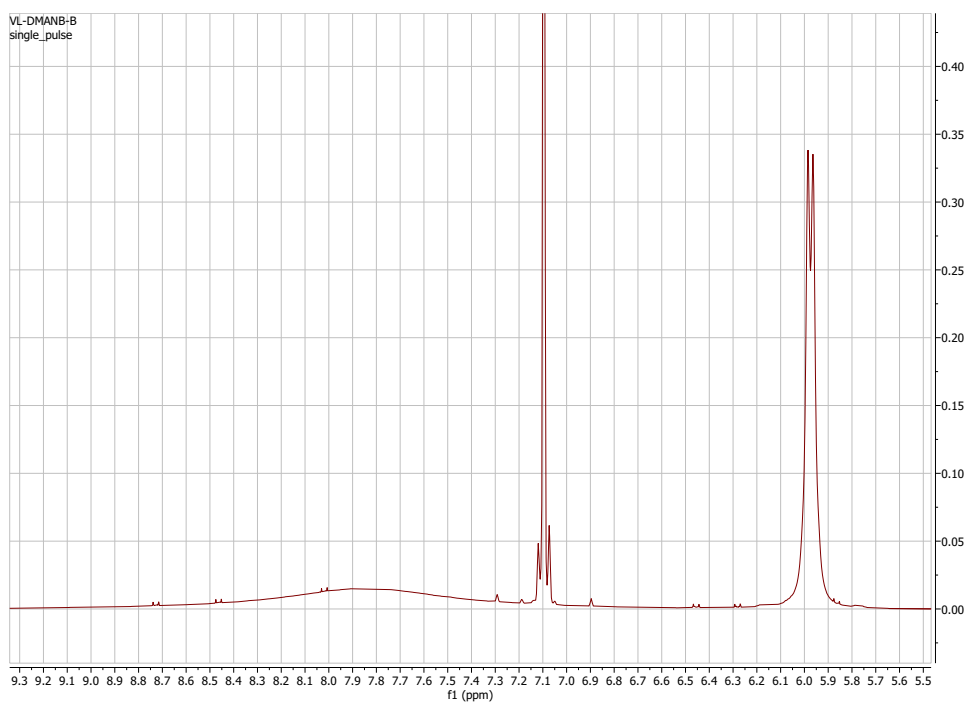

Fig. 3S. <sup>1</sup>H-NMR spectrum of *p*-nitroso-*N,N*-dimethylaminobenzene (**14**) in benzene-*d*<sub>6</sub> at 295°C.

## References

1S. M. J. Frisch, G. W. Trucks, H. B. Schlegel, G. E. Scuseria, M. A. Robb, J. R. Cheeseman, G. Scalmani, V. Barone, G. A. Petersson, H. Nakatsuji, X. Li, M. Caricato, A. V. Marenich, J. Bloino, B. G. Janesko, R. Gomperts, B. Mennucci, H. P. Hratchian, J. V. Ortiz, A. F. Izmaylov, J. L. Sonnenberg, D. Williams-Young, F. Ding, F. Lipparini, F. Egidi, J. Goings, B. Peng, A. Petrone, T. Henderson, D. Ranasinghe, V. G. Zakrzewski, J. Gao, N. Rega, G. Zheng, W. Liang, M. Hada, M. Ehara, K. Toyota, R. Fukuda, J. Hasegawa, M. Ishida, T. Nakajima, Y. Honda, O. Kitao, H. Nakai, T. Vreven, K. Throssell, J. A. Montgomery Jr., J. E. Peralta, F. Ogliaro, M. J. Bearpark, J. J. Heyd, E. N. Brothers, K. N. Kudin, V. N. Staroverov, T. A. Keith, R. Kobayashi, J. Normand, K. Raghavachari, A. P. Rendell, J. C. Burant, S. S. Iyengar, J. Tomasi, M. Cossi, J. M. Millam, M. Klene, C. Adamo, R. Cammi, J. W. Ochterski, R. L. Martin, K. Morokuma, O. Farkas, J. B. Foresman and D. J. Fox, Gaussian 16, Revision A.03, Gaussian, Inc., Wallingford CT, 2016.

2S. M. B. Robin, Higher Excited States of Polyatomic Molecules, 1975, Vol. 2, Academic Press.
